# Supplementary material for: The REAnimation Low Immune Status Markers (REALISM) project: a protocol for broad characterisation and follow-up of injury-induced immunosuppression in intensive care unit (ICU) critically ill patients
Source: PubMed Central journal article supplement — BMJ Open. 2017 Jun 21;7(6):e015734. doi: 10.1136/bmjopen-2016-015734 (PMC5726091; doi:10.1136/bmjopen-2016-015734), 2017-06-21
Supplement: bmjopen-2016-015734.draft_revisions.pdf [file bmjopen-2016-015734.draft_revisions.pdf]

# BMJ Open

**THE Reanimation Low Immune Status Markers (REALISM)  
PROJECT: BROAD CHARACTERIZATION AND FOLLOW-UP OF  
INJURY-INDUCED IMMUNOSUPPRESSION IN Intensive Care  
Unit (ICU) CRITICALLY-ILL PATIENTS**

|                                    |                                                                                                                                                                                                                                                                                                                                                                                                                                                                                                                                                                                                                                                                                                                                                                                                                                                                                                                            |
|------------------------------------|----------------------------------------------------------------------------------------------------------------------------------------------------------------------------------------------------------------------------------------------------------------------------------------------------------------------------------------------------------------------------------------------------------------------------------------------------------------------------------------------------------------------------------------------------------------------------------------------------------------------------------------------------------------------------------------------------------------------------------------------------------------------------------------------------------------------------------------------------------------------------------------------------------------------------|
| Journal:                           | <i>BMJ Open</i>                                                                                                                                                                                                                                                                                                                                                                                                                                                                                                                                                                                                                                                                                                                                                                                                                                                                                                            |
| Manuscript ID                      | bmjopen-2016-015734                                                                                                                                                                                                                                                                                                                                                                                                                                                                                                                                                                                                                                                                                                                                                                                                                                                                                                        |
| Article Type:                      | Protocol                                                                                                                                                                                                                                                                                                                                                                                                                                                                                                                                                                                                                                                                                                                                                                                                                                                                                                                   |
| Date Submitted by the Author:      | 02-Jan-2017                                                                                                                                                                                                                                                                                                                                                                                                                                                                                                                                                                                                                                                                                                                                                                                                                                                                                                                |
| Complete List of Authors:          | <p>ROL, Mary-Luz; BIOASTER<br/>           Venet, Fabienne; Hospices Civils de Lyon, Laboratoire d'Immunologie<br/>           RIMMELE, Thomas; Hospices Civils de Lyon, Département d'Anesthésie et<br/>           de Réanimation<br/>           MOUCADEL, Virginie; bioMerieux<br/>           CORTEZ, Pierre; SANOFI-Aventis<br/>           QUEMENEUR, Laurence; Sanofi Pasteur MSD SNC<br/>           GARDINER, David; GlaxoSmithKline USA<br/>           GRIFFITHS, Andrew; ESPCI ParisTech<br/>           PACHOT, Alexandre; bioMerieux, EA7426 "Pathophysiology of Injury<br/>           Induced Immunosuppression (PI3)"<br/>           Textoris, Julien; bioMerieux, EA7426 "Pathophysiology of Injury Induced<br/>           Immunosuppression (PI3)"; Hospices Civils de Lyon, Département<br/>           d'Anesthésie et de Réanimation<br/>           Monneret, G; Centre Hospitalier Universitaire de Lyon,</p> |
| <b>Primary Subject<br>Heading</b>: | Diagnostics                                                                                                                                                                                                                                                                                                                                                                                                                                                                                                                                                                                                                                                                                                                                                                                                                                                                                                                |
| Secondary Subject Heading:         | Immunology (including allergy), Intensive care, Surgery                                                                                                                                                                                                                                                                                                                                                                                                                                                                                                                                                                                                                                                                                                                                                                                                                                                                    |
| Keywords:                          | Injury-Induced immunosuppression, INTENSIVE & CRITICAL CARE, Innate immunity, Adaptive immunity, Biomarkers, Health Care Associated Infections                                                                                                                                                                                                                                                                                                                                                                                                                                                                                                                                                                                                                                                                                                                                                                             |
|                                    |                                                                                                                                                                                                                                                                                                                                                                                                                                                                                                                                                                                                                                                                                                                                                                                                                                                                                                                            |

SCHOLARONE™  
Manuscripts

1  
2  
3 **THE Reanimation Low Immune Status Markers (REALISM) PROJECT:**  
4  
5 **BROAD CHARACTERIZATION AND FOLLOW-UP OF INJURY-**  
6  
7 **INDUCED IMMUNOSUPPRESSION IN Intensive Care Unit (ICU)**  
8  
9 **CRITICALLY-ILL PATIENTS**  
10  
11  
12  
13  
14  
15

16 Mary Luz ROL<sup>1\*</sup>, Fabienne VENET<sup>2,3\*</sup>, Thomas RIMMELE<sup>3,4</sup>, Virginie MOUCADEL<sup>5</sup>, Pierre  
17 CORTEZ<sup>6</sup>, Laurence QUEMENEUR<sup>7</sup>, David GARDINER<sup>8</sup>, Andrew GRIFFITHS<sup>9</sup>, Alexandre  
18 PACHOT<sup>3</sup>, Julien TEXTORIS<sup>3,4</sup>, Guillaume MONNERET<sup>2,3</sup>, on behalf of the REALISM study  
19 group  
20  
21  
22  
23

24  
25 <sup>1</sup> BIOASTER Technology Research Institute, Lyon, France.  
26

27  
28 <sup>2</sup> Immunology Laboratory, E. Herriot Hospital, Hospices Civils de Lyon; University Claude Bernard  
29 Lyon 1; Lyon, France.  
30

31  
32 <sup>3</sup> EA 7426 “Pathophysiology of Injury-induced immunosuppression”, Université Claude Bernard  
33 Lyon 1 - Hospices Civils de Lyon - bioMérieux, E. Herriot Hospital; Lyon, France.  
34

35  
36 <sup>4</sup> Anesthesiology and Critical Care Medicine, Edouard Herriot Hospital, Hospices Civils de Lyon;  
37 University Claude Bernard Lyon 1; Lyon, France.  
38

39  
40 <sup>5</sup> BioMérieux SA, Medical Diagnostic Discovery Department, Marcy L’Etoile, France.  
41

42  
43 <sup>6</sup> Sanofi Aventis R&D, Chilly-Mazarin, France.  
44

45  
46 <sup>7</sup> Sanofi-Pasteur SA, Lyon, France  
47

48  
49 <sup>8</sup> GlaxoSmithKline, Collegeville, PA, US  
50

51  
52 <sup>9</sup> ESPCI Paris, PSL Research University, 10 Rue Vauquelin, 75005 Paris, France.  
53

54  
55 \*Both authors contributes equally to the work  
56

57  
58  
59  
60

1  
2  
3 **Corresponding Author:** Julien TEXTORIS

4 Laboratoire Commun de Recherche,

5 Pavillon P, Hôpital Edouard Herriot, 5 place d'Arsonval, 69437 LYON Cedex 03, France.

6  
7 Tel: +33 426 038 747

8  
9 Email: julien.textoris@biomerieux.com)

10  
11  
12  
13  
14 **Manuscript word count:** 3579 words

## ABSTRACT

**Introduction.** The host response to septic shock is dynamic and complex. A sepsis-induced immunosuppression phase has recently been acknowledged and linked to bad outcomes and increased healthcare costs. Moreover, a marked suppression of the immune response has also been partially described in patients hospitalized in ICU for severe trauma or burns. It has been hypothesized that immune monitoring could enable identification of patients who might most benefit from novel, adjunctive immune stimulating therapies. However, there is currently neither a clear definition for such injury-induced immunosuppression nor a stratification biomarker compatible with clinical constraints.

**Methods and Analysis.** We set up a prospective, longitudinal single-center clinical study to determine the incidence, severity and persistency of innate and adaptive immune alterations in ICU patients. We optimized a workflow to describe and follow the immuno-inflammatory status of 550 patients (septic shock, severe trauma/burn and major surgery) during the first 2 months after their initial injury. On each time point, two immune functional tests will be performed to determine whole blood TNF-alpha production in response to *ex-vivo* Lipopolysaccharide stimulation and the T lymphocyte proliferation in response to Phytohaemagglutinin. In addition, a complete immunophenotyping using flow cytometry including monocyte HLA-DR expression and lymphocyte subsets will be obtained. New markers (i.e. levels of expression of host mRNA and viral reactivation) will be also evaluated. Reference intervals will be determined from a cohort of 150 age-matched healthy volunteers. This clinical study will provide, for the first time, data describing the immune status of severe ICU patients over time.

**Ethics and dissemination.** Ethical approval has been obtained from the Institutional Review Board (#69HCL15\_0379) and the French National Security agency for drugs and health related products. Results will be disseminated through presentations at scientific meetings and publications in peer-reviewed journals.

1  
2  
3 **Trial registration.** Clinicaltrials.gov Registration number: NCT02638779.  
4

5 **KEYWORDS:** Injury-induced immunosuppression; Intensive Care Unit ; Innate immunity; Adaptive  
6  
7 immunity; Biomarkers; Health Care Associated infections.  
8  
9

10  
11  
12  
13  
14 **Strengths and limitations of this study:**  
15

- 16 • REALISM will be the first study to provide a comprehensive body of data on the  
17 immune status in a large cohort of ICU patients.
- 18 • REALISM will allow to precisely describe the occurrence and depth of injury-induced  
19 immunosuppression in septic, trauma, burns and surgical patients. This project will  
20 also provide long term assessment (D60) of the immune status in ICU patients, which  
21 has never been done before.
- 22 • New biomarkers of the immune status will be assessed in comparison to standardized  
23 tools and immune functional assays.
- 24 • The role of host genomics, microbiota, as well as checkpoint inhibitors expression  
25 will not be assessed in this study.
- 26 • Whether such biomarkers would permit to stratify patients for immunomodulatory  
27 treatments should be addressed in future studies.  
28  
29  
30  
31  
32  
33  
34  
35  
36  
37  
38  
39  
40  
41  
42  
43  
44  
45  
46  
47  
48  
49  
50  
51  
52  
53  
54  
55  
56  
57  
58  
59  
60

## INTRODUCTION

Sepsis is a major health problem and the main etiology for ICU admissions [1,2]. Its incidence is increasing over the years due to several factors, including a better awareness and an aging population [3]. Hospital admissions for sepsis have thus overtaken those for stroke and myocardial infarction [4]. Despite advances on its management, mortality of sepsis has remained stable over the last 20 years, reaching 30-40% in case of septic shock, the most severe form, and it is the leading cause of death in ICU.

Sepsis is a severe infection, defined as a “life-threatening organ dysfunction caused by a dysregulated host response to infection” [5]. Besides circulatory and metabolic abnormalities, the multifaceted host response to the invading pathogen is amplified by comorbid conditions [6,7]. It is now acknowledged that the pro-inflammatory response, which can lead to organ failure, comes with a compensatory anti-inflammatory response. Recovery occurs when inflammation resolves quickly. However, in numerous patients, the anti-inflammatory response lingers on and leads to an immunosuppression state, associated with secondary infections, and increased morbidity and mortality [8]. This sepsis-induced immunosuppression could explain the failure of several previous clinical trials and support new innovative trials testing immune adjuvant drugs in septic shock [9].

Therefore, several studies and case reports now support the rational of boosting the immune system, in order to avoid the occurrence of health-care associated infection and therefore reduce the associated morbidity [10,11]. However, to avoid reproducing the errors from the past, such innovative treatments should be administered only to those individuals identified as immunosuppressed [11]. Some studies have already demonstrated that the concept of biomarker-guided therapeutic stratification can lead to clinical improvements [12].

A marked immunosuppression has been partially described in other patients admitted to the ICU for severe trauma/burns and other major surgeries [12–15]. In these “sterile” injuries, signs of injury-induced immune alterations have also been associated with increased susceptibility to secondary infections and mortality.

5

1  
2  
3 Given the complexity and heterogeneity of ICU patients, it is unlikely that any single biomarker will  
4 be sufficient to describe and diagnose injury-induced immunosuppression. On the contrary, a panel of  
5 validated biomarkers may bring enough information to accomplish such complex endeavor.  
6  
7  
8  
9

## 10 11 **Rationale of the study** 12

13  
14 From a clinical perspective, no specific clinical signs or symptoms are associated with a state of  
15 altered immune response to allow prospective identification of at risk patients. Further, the outcomes  
16 of sustained immunosuppression are best defined by clinical relevant endpoints such as the occurrence  
17 of opportunistic and secondary infections. However, waiting for such a health-care associated  
18 infection to occur does not facilitate implementation of preventive strategies. Thus, diagnosis will rely  
19 on biomarkers.  
20

21 From a biological perspective, sepsis-induced immunosuppression may be best identified by immune  
22 *functional* assays (such as cytokine release or lymphocytes proliferation after *ex-vivo* stimulation), or  
23 cell count parameters (such as, number of lymphocytes or level of expression of mHLA-DR) but both  
24 approaches present drawbacks. Indeed, such functional assays are not suitable to stratify patients in a  
25 prospective interventional clinical trial due to (1) the long time to results (up to 5 days for  
26 lymphocytes proliferation), and (2) poor reproducibility due to standardization issues and  
27 cumbersome technique. Due to such complexity, these reference tests are rarely performed in clinical  
28 studies evaluating biomarkers associated with deleterious outcomes in ICU.  
29

30 On the other hand, HLA-DR expression on monocytes is currently the best biomarker available for  
31 such a routine use [17], and is being employed for patient stratification in a large multicenter  
32 interventional trial assessing the administration of GM-CSF in patients with septic shock [18].  
33

34 However, its measurement requires flow cytometry analysis within 4hours of blood sampling which  
35 may not be available in all centers, making interlaboratory standardization challenging.  
36

37 As a consequence of the previously discussed challenges, numerous biomarkers proposed to monitor  
38 injury-induced immune alterations have yet to be compared to these *reference* assays.  
39  
40  
41

## Hypothesis

Although several studies have shown an association between markers related to the immune system (e.g. HLA-DR) and the occurrence of healthcare-associated infections in septic patients [14,15,19], we still do not have a clear and operational definition of the immune deficiency that occurs in severely injured ICU patients. Precise description of injury-induced immunosuppression incidence and its characteristics are lacking. In the REALISM (REAnimation Low Immune Status Markers) project, we propose to broadly assess immune parameters over time and to correlate these findings with clinical epidemiologic data and outcomes in order to identify and define immunosuppression in ICU patients both in terms of magnitude and time duration.

To this aim, we have established two standardized functional immune assays (whole blood TNF $\alpha$  release after ex-vivo stimulation with LPS (Lipopolysaccharides) [20] and lymphocyte proliferation in response to ex-vivo stimulation with PHA (Phytohaemagglutinin) [21]). ***We propose to define the status of immunosuppression on the basis of an abnormal result (values outside the reference intervals) obtained in at least one of the two “reference” test.***

The REALISM project aims to provide a validated operational definition of injury-induced immunosuppression predicting clinically relevant outcomes. This will facilitate development of new tools and biomarkers with the goal of introducing diagnosis of immune suppression into routine clinical practice and allow patient stratification for the evaluation of new individual immunotherapies. It may also enable the identification of new targets and the development of new innovative therapeutics to treat ICU patients and prevent opportunistic infections in the future

## Primary Aim

The primary objective of the study is to determine the incidence of injury-induced immunosuppression in ICU patients, during the first two months after injury.



## Secondary Aims

The secondary objectives of the study are:

- To describe the occurrence of immunosuppression, its depth and impact on innate and adaptive immune responses, and its evolution during the first 2 months after injury.
- To assess the strength of the proposed definition, in particular by evaluating its association with secondary infections and mortality.
- To assess the accuracy of new biomarkers and immune functional assays to diagnose immunosuppression.

## METHODS AND ANALYSIS

REALISM is a prospective longitudinal, single-center observational study, conducted in the anesthesiology and intensive care department at the Edouard Herriot hospital (University hospital, Lyon France, capacity of approximately 1,000 beds).

### Study population

REALISM will include healthy volunteers (n=150) and patients at risk of injury-induced immunosuppression: (1) septic shock patients (n=160); (2) severe trauma patients (n=180); (3) severe burns patients (n=30); and (4) patients admitted to the ICU after major surgery (n=180).

Septic shock inclusion criteria follow the current definition [5] and require a state of shock defined by vasopressors administration and plasma lactate level above 2 mmol/L (18 mg/dL). An infection must be suspected, and microbiological sampling should have been performed, along with the administration of antimicrobials. Only primary septic shock will be considered (vasopressors should have been started within the first 48hours after ICU admission) [5].

Patients with severe trauma, defined by an injury severity score (ISS, Baker *et al.*, 1974) > 15 [22], will be included in the study. As we hypothesized that the depth of immunosuppression might be related to severity, we will limit the group of patients between ISS = [15-25] to 90 patients to ensure at least 50% of the cohort includes patients with an ISS > 25. Severe burn patients will be selected for inclusion based on a total burn surface area over 30%.

Surgical patients will be screened according to the planned surgical procedure. This study will include patients undergoing: 1) eso-gastrectomy; (2) Bricker's bladder resection (total bladder resection with reconstruction from small bowel); (3) cephalic pancreaticoduodenectomy (Whipple's procedure); (4) abdominal aortic aneurism surgery by laparotomy.

Exclusion criteria are mainly related to factors that might impact the immune status and bias the results such as: severe neutropenia (neutrophil count  $<0.5$  G/L), administration of immunosuppressive therapy, corticosteroids (IV if oral administration), use of therapeutic antibodies (such as anti-TNF alpha), onco-hematological disease (e.g. lymphoma, leukemia) under treatment or treated within 5 years before inclusion, end of chemotherapy within the 6 months prior to inclusion date. Patients with congenital/hereditary or acquired immune deficiency (for example severe combined immunodeficiency, HIV or AIDS, at any stage), and patients that have received extra-corporeal circulation in the month preceding inclusion will be excluded as well.

Considering the possible influence of gender bias on measured parameters, we will recruit healthy donors from both genders, following the age and gender distribution of the French population.

Complete lists of the inclusion and exclusion criteria for patients and healthy volunteers are presented in Table 1 and Table 2 respectively.

| <b>Table 1. Inclusion and exclusion criteria for patients</b>                                                                                                    |
|------------------------------------------------------------------------------------------------------------------------------------------------------------------|
| <b>Inclusion criteria</b>                                                                                                                                        |
| Male or female aged over 18 years                                                                                                                                |
| Patient or next of kin having been informed of the conditions of the study and having signed the informed consent form                                           |
| Patient hospitalized for:                                                                                                                                        |
| <b>Septic shock, defined by:</b>                                                                                                                                 |
| Infection site suspected, and microbiological analysis sampling carried out                                                                                      |
| Vasopressor therapy needed to elevate MAP (Mean Arterial Pressure) $\geq 65$ mm Hg and lactate $> 2$ mmol/L (18 mg/dL) despite adequate fluid resuscitation [26] |
| Noradrenalin $> 0.20$ $\mu\text{g}/\text{kg}/\text{min}$ for at least 2 hours                                                                                    |
| Noradrenalin started within 48 hours after ICU admission                                                                                                         |
| <b>Serious trauma, defined by:</b>                                                                                                                               |
| Patient admitted directly to the recruiting ICU                                                                                                                  |
| Injury Severity Score Baker <i>et al.</i> , 1974 $> 15$ [22]                                                                                                     |
| <b>Severe burns, defined by:</b>                                                                                                                                 |
| Total burned surface area $> 30\%$                                                                                                                               |
| <b>Major surgery, defined by:</b>                                                                                                                                |

|    |                                                                                                     |
|----|-----------------------------------------------------------------------------------------------------|
| 1  |                                                                                                     |
| 2  |                                                                                                     |
| 3  |                                                                                                     |
| 4  | Surgery set for one of the following indications: (i) eso-gastrectomy; (ii) Bricker's bladder       |
| 5  | resection (total bladder resection with reconstruction from small bowel); (iii) cephalic            |
| 6  | pancreaticoduodenectomy (Whipple's procedure); (iv) abdominal aortic aneurism surgery by            |
| 7  | laparotomy. Categories i to iii concern management of solid tumors, while category iv concerns      |
| 8  | non-cancerous pathologies                                                                           |
| 9  |                                                                                                     |
| 10 | Induction of anesthesia before 11 am (to permit same day processing of all samples)                 |
| 11 |                                                                                                     |
| 12 | <b>Exclusion criteria</b>                                                                           |
| 13 | Patient with severe neutropenia (neutrophil count <0.5 G/L)                                         |
| 14 | Patients receiving immunosuppressive therapy                                                        |
| 15 | Corticosteroids (IV or Per os).                                                                     |
| 16 | Use of therapeutic antibodies                                                                       |
| 17 |                                                                                                     |
| 18 | Onco-hematological disease (ex. Lymphoma, leukemia...) under treatment, or treated within 5 years   |
| 19 | before inclusion                                                                                    |
| 20 |                                                                                                     |
| 21 | End of chemotherapy within the 6 months prior to inclusion date                                     |
| 22 |                                                                                                     |
| 23 | Patient with innate or acquired immune deficiency (for example severe combined                      |
| 24 | immunodeficiency, HIV or AIDS, any stage)                                                           |
| 25 |                                                                                                     |
| 26 | Patients with a "do not resuscitate order" or a "withdraw of care" decision, at time of inclusion   |
| 27 |                                                                                                     |
| 28 | Patient whose anticipated duration of hospitalization in the ICU is estimated at less than 48 hours |
| 29 |                                                                                                     |
| 30 | Participation in any interventional study                                                           |
| 31 |                                                                                                     |
| 32 | Extra-corporeal circulation in the month preceding inclusion in the case of cardiac surgery         |
| 33 |                                                                                                     |
| 34 | Pregnant or breastfeeding women                                                                     |
| 35 |                                                                                                     |
| 36 | Patient with no social security insurance, with restricted liberty or under legal protection        |

|    |                                                                                    |
|----|------------------------------------------------------------------------------------|
| 34 | <b>Table 2: Inclusion and exclusion criteria for healthy volunteers</b>            |
| 35 |                                                                                    |
| 36 | <b>Inclusion criteria</b>                                                          |
| 37 | Male or female aged over 18 years                                                  |
| 38 | Normal clinical examination                                                        |
| 39 | Signed informed consent form                                                       |
| 40 | Person with social security insurance                                              |
| 41 |                                                                                    |
| 42 |                                                                                    |
| 43 | <b>Exclusion criteria</b>                                                          |
| 44 | Person with an infectious syndrome during the last 90 days                         |
| 45 | Extreme physical stress within the last week                                       |
| 46 |                                                                                    |
| 47 | <b>Person having received within the last 90 days, a treatment based on:</b>       |
| 48 | Antivirals                                                                         |
| 49 | Antibiotics                                                                        |
| 50 | Antiparasitics                                                                     |
| 51 | Antifungals                                                                        |
| 52 |                                                                                    |
| 53 | Person having received within the last 15 days, a treatment based on non-steroidal |
| 54 | anti-inflammatory drugs (NSAIDs)                                                   |
| 55 |                                                                                    |
| 56 | <b>Person having received within the last 24 months, a treatment based on:</b>     |

|                                                                |
|----------------------------------------------------------------|
| Immunosuppressive therapy                                      |
| Corticosteroids (IV or Per os)                                 |
| Therapeutic antibodies                                         |
| Chemotherapy                                                   |
| <b>History of :</b>                                            |
| Innate or acquired immune deficiency                           |
| Hematological disease                                          |
| Solid tumor                                                    |
| Severe chronic disease                                         |
| Surgery or hospitalization within the last 2 years             |
| Pregnancy within the last year                                 |
| Participation to a phase I clinical assay during the last year |
| Participation to a phase I clinical assay during the last year |
| Pregnant or breastfeeding women                                |
| Person with restricted liberty or under legal protection       |

### Sampling schedule

Samples and clinical data will be collected 3 to 4 times within the first week (early time-points) with the aim to evaluate the modulation of the immune status early after injury. Samples will be collected at day 1 (the morning following injury), at day 2 (for the severe trauma group) and at day 3/4 and day 5/7 (Table 3). Samples will also be collected before surgery, at day 0, as surgical patients are the only group for which sampling can be performed before injury. Additional samples will be collected during late time points to evaluate the recovery of the immune status, at day 14 (between day 13 to 18), day 28 (between day 26 to 36) and day 60 (between day 52 to 68), depending on patient availability and technical constraints (Figure 1).

### Definition of Immunosuppression

The REALISM project will monitor the immune function of the patients and healthy volunteers using two standardized immune functional tests: one reference test to evaluate the innate immune response (whole blood production of TNF-alpha in response to ex vivo stimulation by LPS) and a second reference test for the adaptive immune response (the lymphocyte proliferation in response to ex vivo T cell stimulation with PHA). Immunosuppression will be defined in comparison to the values as

1  
2  
3 obtained in a group of healthy volunteers for the two reference tests using the following methodology.  
4  
5 First, reference intervals (RI) will be derived from the independent set of healthy volunteers. Second,  
6  
7 immunosuppression will be defined in a patient when an abnormal result (value outside the reference  
8  
9 intervals) is obtained in at least one of the two “reference” tests over at least two consecutive time  
10  
11 points

## 12 13 14 15 **Definition of Secondary infection**

16  
17  
18 During the ICU stay, patients will be screened daily for exposure to invasive devices (intubation,  
19  
20 indwelling urinary catheter, and central venous line) and occurrence of secondary infection.  
21  
22 Information referent to infections will be collected, reviewed and validated by a dedicated  
23  
24 adjudication committee, composed of 3 physicians not involved in the recruitment of the patients with  
25  
26 confirmation of secondary infection made according to the definitions used by the European center for  
27  
28 disease prevention and control [23] and the Infectious Diseases Society of America.  
29  
30  
31

## 32 33 **Immune functional assays**

### 34 35 *Innate immune response: TNF- $\alpha$ release after LPS whole blood stimulation*

36  
37 Innate immune response will be evaluated by measuring the production of TNF- $\alpha$  in response to *ex*  
38  
39 *vivo* stimulation of whole blood by LPS [20]. The stimulation will be performed through the use of  
40  
41 standardized TruCulture<sup>®</sup> tubes from MYRIAD RBM (MYRIAD RBM; Austin, USA) (the  
42  
43 concentration, quality and activity of the LPS is guaranteed by the manufacturer MYRIAD RBM)  
44  
45 [20]. The tubes contain the medium alone (Null) or the medium with LPS 100 ng/ml (LPS from *E.coli*  
46  
47 O55:B5) (LPS-R; Null-R; MYRIAD RBM). The blood samples will be collected on heparin and  
48  
49 transported to the laboratory where 1 ml of heparinized blood will be transferred to each TruCulture<sup>®</sup>  
50  
51 tube and incubated for 24 hours at 37°C. Following incubation, the supernatant will be collected and  
52  
53 stored at -80°C until batch quantification of TNF- $\alpha$  by ELISA (BE55001; BL International-Tecan;  
54  
55 Männedorf, Switzerland).  
56  
57

### *Adaptive immune response: T lymphocyte proliferation after ex vivo PBMCs mitogenic stimulation*

Adaptive immune response will be assessed by measuring T lymphocyte proliferation in response to *ex vivo* stimulation with a mitogen [21]. Briefly, Peripheral Blood Mononuclear Cells (PBMC) isolated by Ficoll density gradient centrifugation (U-04; Eurobio; Les Ulis, France) will be stimulated with PHA (HA16; Remel; Lenexa, USA), at 37°C for 72 hours. Following incubation, the cells will be harvested and cell's proliferation will be determined by the incorporation of EdU (5-ethynyl-2'-deoxyuridine) in T cells (gated as CD3+) using flow cytometry [21].

## **Cellular Immunophenotyping**

Phenotypic immune cells characterization and cell counting will be completed by flow cytometry. We will count the number of B-lymphocytes, CD4+ and CD8+ T-lymphocytes, NK cells, regulatory T-lymphocytes, mature and immature polymorphonuclear cells, as previously published [24,25]. In addition, the number of HLA-DR molecules per monocyte will be determined using the BD quantibrite standardized method (HLA-DR:340827; QuantiBRITE:340495; Becton Dickenson; New Jersey, USA) [26]. It is well known that the flow cytometry is highly sensitive to variation between labs and instruments; therefore a validation with the routine hospital immunology lab was performed to guarantee that all the protocols reproducible and standardized. All procedures generated results with less than 20% of variation when compared to reference protocols.

## **Biobanking**

This study will provide the opportunity to establish four different types of biobanks to preserve the material collected, enabling exploration of innovative biomarkers: (1) Truculture<sup>®</sup> plasma biobank from whole blood stimulated with LPS, SEB (*Staphylococcus aureus* enterotoxin-B) or not stimulated, to study cytokines release. (2) EDTA plasma biobank to study viral reactivation markers and soluble host biomarkers. (3) Heparin plasma biobank for metabolomics/proteomics soluble host

biomarkers studies; (4) RNA biobank to study new transcriptomic host biomarkers (RNA will be extracted from whole blood collected in PAXgene<sup>®</sup> tubes).

### **Innovative immune functional assays and exploration of new biomarkers**

Regarding the immune functional tests, other stimulants (e.g. SEB) and read-outs (e.g. Interleukin 2, Interferon gamma) will be tested using the TruCulture<sup>®</sup> tubes and commercial or home-made assays. Finally, a metabolomics and proteomics study will be performed using frozen (heparin) plasma. Biomarkers potentially associated to immune deficiency will be identified by LC-MS on high resolution mass spectrometry and <sup>1</sup>H-NMR, after polar and non-polar samples extraction.

### **Sample size and data analysis plan**

#### *Population sizing*

The number of healthy volunteers required to determine the reference intervals for the two immune reference tests was defined according to the methodology recommended by the Clinical and Laboratory Standards Institute (CLSI) C28-A3 guidelines [27]. The minimal number of subjects recommended being 120, after exclusion of aberrant values (confidence interval of 90%), we decided to include 150 healthy volunteers to take into account exclusions related to technical reasons, aberrant values or consent withdrawal.

For this reference population, the age range of healthy volunteers group has been carefully calculated to include the expected age range and gender distribution from ICU patients in France (Table 3).

| <b>Table 3.</b> Age and gender distribution for the reference group |             |          |
|---------------------------------------------------------------------|-------------|----------|
| <b>Age range</b>                                                    | <b>Male</b> | <b>F</b> |
| [19-30[                                                             | 14          | 14       |
| [30-50[                                                             | 25          | 25       |
| [50-65[                                                             | 18          | 19       |



|          |    |    |
|----------|----|----|
| [65-100[ | 15 | 20 |
| Total    | 72 | 78 |

The main objective being descriptive, the computation of the sample size was based on secondary objectives, especially for 1) the analysis of the occurrence of immunosuppression, its depth and impact on innate and adaptive immune responses (Cohen d is 0.55) and 2) the correlation between new biomarkers and immune functional assays to diagnose immunosuppression ( $r > 0.4$ ). A Student t-test was used to approximate the number of patients needed and a minimum of 150 patients per group was required for a standardized Cohen's d effect = 0.55, if we get the recommended number of healthy volunteers of 120. It was therefore decided to include 160 septic shock patients, 180 severe trauma patients and 180 patients with a major surgery, to overcome secondary exclusions for technical causes or consent withdrawal. The severe burn patients group is an ancillary group that was arbitrary fixed at 30 subjects in order to collect data with the intent to inform a dedicated study on this population in the future.

#### *Statistical analysis.*

First, the percentage of patients meeting the definition of injury-induced-immunosuppression will be computed in each patients group to answer the main objective. Second, the occurrence of immunosuppression will be further described. The proportion of patients with at least one abnormal test will be computed for both immune reference tests and each patients group. The correlation between the 2 reference tests will be established from a Spearman correlation test. A mixed model will be constructed to describe the extent of the changes in the innate and adaptive measures over time, taking groups and time points into account. Third, a comparison of each biomarker or new functional tests with the two reference tests will be performed using a Spearman correlation test. For correlated biomarkers or functional tests, the performance for prediction of secondary infection will be estimated from a ROC curve. A Fine & Gray predictive model will be constructed [28] for the biomarkers harboring the best areas under curve, taking into account the competing risk of mortality.

1  
2  
3  
4  
5  
6  
7  
8  
9  
10  
11  
12  
13  
14  
15  
16  
17  
18  
19  
20  
21  
22  
23  
24  
25  
26  
27  
28  
29  
30  
31  
32  
33  
34  
35  
36  
37  
38  
39  
40  
41  
42  
43  
44  
45  
46  
47  
48  
49  
50  
51  
52  
53  
54  
55  
56  
57  
58  
59  
60

Finally, multiple imputations will be taken into consideration in the case of a relevant amount of missing values.

For peer review only

## ETHICS AND DISSEMINATION

### Ethics approval

The protocol, information documents and consent forms received approval by the local Institutional Review Board (Comité de Protection des Personnes Sud-Est II, Bron, France) and the French National Security agency for drugs and health related products (Approval code: 69HCL15\_0379, 30<sup>th</sup> of November of 2015). An amendment has been filled to extend sampling time points over the first week and add the metabolomics and proteomics study. This amendment has been approved on the 22<sup>nd</sup> of July of 2016 (protocol version 3). This study complies with the Declaration of Helsinki, principles of Good Clinical Practice and the French personal data protection act.

### Informed consent

The free and informed consent of each patient and healthy volunteer will be obtained following a complete and faithful information, in comprehensive words, of the objectives, the proceedings and the constraints of the study, the right to refuse the enrollment or the possibility to withdraw at any time, when he/she is in capacity to understand. The patient (or next of kin) will also be informed of: (1) the existence of processing system for data concerning them; (2) Their right to access and rectify these data (accessible through the physician of their choice); (3) The possibility of the use of remaining biological material and associated data stored following the end of the study and their possible transfer to another academic or private party. This information is part of the written notice and the informed consent.

If the patient is not in capacity to understand and/or express his/her consent, the informed consent will be obtained from a next of kin. In the event that only the informed consent of a third party has been sought at the time of inclusion, the patients should be informed as soon as possible of their participation in this study and be asked to give their own consent to continue the study.

1  
2  
3 If the next of kin is not present and not available by phone, the patient may be included in emergency  
4 situation. The investigator will be required to record all steps for calling the next of kin in the medical  
5 record (Contact attempts with date, time and phone number ...) and justify patient inclusion in medical  
6 emergencies in accordance with French legislation. The written consent of the next of kin and the  
7 patient should be obtained as soon as the person is available and as soon as the patient's clinical  
8 condition allows. The consent form contains the possibility to refuse the storage of samples after the  
9 end of the study.  
10  
11  
12  
13  
14  
15  
16  
17  
18  
19

## 20 **Safety of participants**

21  
22 This study includes no serious foreseeable risk to the health of the persons involved. The only  
23 potential risk is related to blood sample collection (maximum 192 ml collected over all time points – 2  
24 months). However, this aspect of nursing is part of daily practice. Blood samples will be taken under  
25 the same conditions of safety as currently used for common diagnostic tests.  
26  
27  
28  
29  
30  
31

## 32 **Study management**

33  
34 The study is managed by BIOASTER, and a dedicated team composed from members of all the  
35 consortium partners. The promoter of the study is the Hospices Civils de Lyon. The principal  
36 investigator is Dr Thomas Rimmelé.  
37  
38  
39  
40  
41  
42  
43

## 44 **Data management**

### 45 *Clinical data*

46  
47 For each patient, an electronic case report form including socio-demographic, clinical and para-  
48 clinical information will be completed by clinical research assistants (Table 4). A description of the  
49 hospital stay, the documentation on the type of injury (surgery, burn, trauma or septic shock) and the  
50 severity as defined by the ASA classification, SOFA score [29] and SAPSII score [30]. In addition,  
51 we will collect routine lab results about the CMV, HSV1 serology and Complete Blood Count (CBC).  
52  
53  
54  
55  
56  
57  
58  
59  
60

Moreover, we will document if there is any specific treatments administered to the patient, such as antibiotics, exposure to invasive medical devices and secondary infections. All data will be transferred to a TransSMART [31] database following curation for data exploration and analysis.

**Table 4 Clinical and biological data collection planning.**

|                                                            | D0 <sup>a</sup> | D1 (2 <sup>f</sup> ) | D2 <sup>c</sup> | D3/4           | D5/7           | ICU Release | Hospital release | J14<br>D13/18  | J28<br>D26/36  | J60<br>D52/68  | D90            |
|------------------------------------------------------------|-----------------|----------------------|-----------------|----------------|----------------|-------------|------------------|----------------|----------------|----------------|----------------|
| Inclusion/exclusion criteria                               |                 | x <sup>b</sup>       |                 |                |                |             |                  |                |                |                |                |
| Consent form                                               |                 | x <sup>b</sup>       |                 |                |                |             |                  |                |                |                |                |
| Demography                                                 |                 | x <sup>b</sup>       |                 |                |                |             |                  |                |                |                |                |
| Weight                                                     |                 | x <sup>b</sup>       |                 |                |                |             |                  |                |                |                |                |
| Size                                                       |                 | x <sup>b</sup>       |                 |                |                |             |                  |                |                |                |                |
| Description of hospital stay                               |                 | x <sup>b</sup>       |                 |                |                |             |                  |                |                |                |                |
| IGS II score                                               |                 | x <sup>b</sup>       |                 |                |                |             |                  |                |                |                |                |
| McCabe score                                               |                 | x <sup>b</sup>       |                 |                |                |             |                  |                |                |                |                |
| CHARLSON score                                             |                 | x <sup>b</sup>       |                 |                |                |             |                  |                |                |                |                |
| Documentation of the septic shock, surgery, burn or trauma |                 | x <sup>b</sup>       |                 |                |                |             |                  |                |                |                |                |
| SOFA score                                                 | x               | x                    | x               | x              | X              |             |                  |                |                |                |                |
| Treatments against infections                              | Steadily        |                      |                 |                |                |             |                  | x              | x              | x              | x              |
| Therapeutic management                                     | Steadily        |                      |                 |                |                |             |                  |                |                |                |                |
| Exposition to medical devices                              | Steadily        |                      |                 |                |                |             |                  |                |                |                |                |
| Surveillance of health-care associated infections          | Steadily        |                      |                 |                |                |             |                  | x <sup>d</sup> | x <sup>d</sup> | x <sup>d</sup> | x <sup>d</sup> |
| Concomitant events                                         | Steadily        |                      |                 |                |                |             |                  | x              | x              | x              | x              |
| Vital status                                               |                 |                      |                 |                |                | X           | x                | x              | x              | x              | x              |
| Life quality (EQ5D)                                        |                 |                      |                 |                |                |             |                  |                |                |                | x              |
| <b>Biology</b>                                             |                 |                      |                 |                |                |             |                  |                |                |                |                |
| PAXgene® tube sampling                                     | x               | x                    | x               | x              | X              |             |                  | x              | x              | x              |                |
| EDTA tubes sampling                                        | x               | x                    | x               | x              | X              |             |                  | x              | x              | x              |                |
| Heparin tubes sampling                                     | x               | x                    | x               | x              | X              |             |                  | x              | x              | x              |                |
| Hematology                                                 | x               | x                    | x               | x              | X              |             |                  | x              | x              | x              |                |
| Lactate                                                    | x <sup>e</sup>  | x <sup>e</sup>       | x <sup>e</sup>  | x <sup>e</sup> | x <sup>e</sup> |             |                  |                |                |                |                |
| pH                                                         | x <sup>e</sup>  | x <sup>e</sup>       | x <sup>e</sup>  | x <sup>e</sup> | x <sup>e</sup> |             |                  |                |                |                |                |
| Liver results (ASAT, ALAT, PAL)                            | x <sup>e</sup>  | x <sup>e</sup>       | x <sup>e</sup>  | x <sup>e</sup> | x <sup>e</sup> |             |                  |                |                |                |                |

|                                                                                                                   |                |                |                |                |                |  |  |                |                |                |                |
|-------------------------------------------------------------------------------------------------------------------|----------------|----------------|----------------|----------------|----------------|--|--|----------------|----------------|----------------|----------------|
| Procalcitonin                                                                                                     | x <sup>e</sup> |  |  | x <sup>e</sup> | x <sup>e</sup> | x <sup>e</sup> | x <sup>e</sup> |
| Serology (CMV, HSV1)                                                                                              |                | X <sup>b</sup> |                |                |                |  |  |                |                |                |                |
| <sup>a</sup> Only for patients of the surgery group                                                               |                |                |                |                |                |  |  |                |                |                |                |
| <sup>b</sup> Evaluation on day 0 for patients of the surgery group (not repeated on day 1)                        |                |                |                |                |                |  |  |                |                |                |                |
| <sup>c</sup> Only for patients of the trauma group                                                                |                |                |                |                |                |  |  |                |                |                |                |
| <sup>d</sup> only if related to a new hospitalization                                                             |                |                |                |                |                |  |  |                |                |                |                |
| <sup>e</sup> if available                                                                                         |                |                |                |                |                |  |  |                |                |                |                |
| <sup>f</sup> for the septic shock and burn patients: The enrollment at D2 will be accepted if D1 is not available |                |                |                |                |                |  |  |                |                |                |                |

## Duration of the study

The study is planned to run for thirty months, starting December 2015. The expected end date for recruitment is June 2018. Some biomarkers will be quantified by batch analysis, at the end of the study. Primary data analysis is expected to be completed with subsequent dissemination of results by December 2018

## Acknowledgement

### *Sponsorship*

The project is funded by a consortium: bioMérieux, SANOFI, GlaxoSmithKline, Ecole Supérieure de Physique Chimie Industrielles de la ville the Paris – PSL Research University, the University Hospital Hospices Civils de Lyon and the microbiology technological institute BIOASTER. The project is financially supported in part by public funding through BIOASTER and Hospices Civils de Lyon. The project will be audited annually by the French National Research Agency (“Investissement d’Avenir” program; grant n°ANR-10-AIRT-03).

### *Consent for publication*

Not applicable

### *Competing interests*

1  
2  
3 AP, JT, VM are employees of bioMérieux, an in-vitro diagnostic company. PC, LK and DG are  
4  
5 employees of Sanofi-Aventis R&D, Sanofi-Pasteur SA, and GlaxoSmithKline, three pharmaceutical  
6  
7 companies.  
8  
9

#### 10 11 *Data sharing statement*

12  
13 Results will be disseminated through presentations at scientific meetings and publications in peer-  
14  
15 reviewed journals. New markers and immune functional tests will be evaluated for the diagnostic  
16  
17 immune deficiency and may be patentable.  
18  
19

#### 20 21 **Contributorship statement:**

22  
23 All authors (MLR, FV, TR, VM, PC, LQ, DG, AG, AP, JT, GM) fulfils ICMJE guidelines and (1)  
24  
25 provided substantial contributions to conception, design and acquisition of data, (2) drafted and revised  
26  
27 critically the manuscript and, (3) approved the final version of the manuscript.  
28  
29  
30  
31

#### 32 **Contributors**

##### 33 **The REALISM Study Group**

34  
35 *For University Hospital (Hospices Civils de Lyon):* Asma BEN AMOR, André BOIBIEUX, Julien  
36  
37 DAVIDSON, Laure FAYOLLE-PIVOT, Charline GENIN, Arnaud GREGOIRE, Alain LEPAPE,  
38  
39 Anne-Claire LUKASZEWICZ, Guillaume MARCOTTE, Delphine MAUCORT-BOULCH, Boris  
40  
41 MEUNIER, Guillaume MONNERET, Nathalie PANEL, Thomas RIMMELE, Hélène VALLIN,  
42  
43 Fabienne VENET  
44  
45

46  
47 *For bioMérieux:* Sophie BLEIN, Karen BRENGEL-PESCE, Elisabeth CERRATO, Valérie  
48  
49 CHEYNET, Emmanuelle GALLET-GORIUS, Audrey GUICHARD, François MALLET, Virginie  
50  
51 MOUCADEL, Marine MOMMERT, Guy ORIOL, Alexandre PACHOT, Claire SCHREVEL, Olivier  
52  
53 TABONE, Julien TEXTORIS, Javier YUGUEROS MARCOS.

54  
55 *For BIOASTER:* Jérémie BECKER, Frédéric BEQUET, Yacine BOUNAB, Nathalie GARCON, Irène  
56  
57 GORSE, Cyril GUYARD, Fabien LAVOCAT, Philippe LEISSNER, Karen LOUIS, Maxime  
58  
59  
60

MISTRETTA, Yoann MOUSCAZ, Laura NOAILLES, Magali PERRET, Frédéric REYNIER, Cindy RIFFAUD, Mary-Luz ROL, Nicolas SAPAY, Trang TRAN, Christophe VEDRINE.

*For Sanofi:* Nicolas BURDIN, Christophe CARRE, Pierre CORTEZ, Aymeric DE MONFORT, Karine FLORIN, Laurent FRAISSE, Isabelle FUGIER, Sandrine PAYRARD, Annick PELERAUX, Laurence QUEMENEUR

*For ESPCI Paris:* Andrew GRIFFITHS, Stephanie TOETSCH

*For GSK:* Theresa ASHTON, Peter GOUGH, Scott BERGER, Lionel TAN, Iain GILLESPIE, David GARDINER

## REFERENCES

- 1 Jawad I, Lukšić I, Rafnsson SB. Assessing available information on the burden of sepsis: global estimates of incidence, prevalence and mortality. *J Glob Health* 2012;2:4.
- 2 Vincent J-L, Marshall JC, Namendys-Silva SA, *et al.* Assessment of the worldwide burden of critical illness: the Intensive Care Over Nations (ICON) audit. *Lancet Respir Med* 2014;2:380–6.
- 3 Walkey AJ, Lagu T, Lindenauer PK. Trends in sepsis and infection sources in the United States. A population-based study. *Ann Am Thorac Soc* 2015;12:216–20.
- 4 Seymour CW, Rea TD, Kahn JM, *et al.* Severe Sepsis in Pre-Hospital Emergency Care: Analysis of Incidence, Care, and Outcome. *Am J Respir Crit Care Med* 2012;186:1264–71.
- 5 Singer M, Deutschman CS, Seymour CW, *et al.* The Third International Consensus Definitions for Sepsis and Septic Shock (Sepsis-3). *JAMA* 2016;315:801. doi:10.1001/jama.2016.0287
- 6 Angus DC, van der Poll T. Severe Sepsis and Septic Shock. *N Engl J Med* 2013;369:840–51.
- 7 Cohen J, Vincent J-L, Adhikari NK, *et al.* Sepsis: a roadmap for future research. *Lancet Infect Dis* 2015;15:581–614.
- 8 Hotchkiss RS, Monneret G, Payen D. Sepsis-induced immunosuppression: from cellular dysfunctions to immunotherapy. *Nat Rev Immunol* 2013;13:862–74.
- 9 Hotchkiss RS, Monneret G, Payen D. Immunosuppression in sepsis: a novel understanding of the disorder and a new therapeutic approach. *Lancet Infect Dis* 2013;13:260–8.
- 10 Delsing CE, Gresnigt MS, Leentjens J, *et al.* Interferon-gamma as adjunctive immunotherapy for invasive fungal infections: a case series. *BMC Infect Dis* 2014;14:166.
- 11 Venet F, Lukaszewicz A-C, Payen D, *et al.* Monitoring the immune response in sepsis: a rational approach to administration of immunoadjuvant therapies. *Curr Opin Immunol* 2013;25:477–83.



- 1  
2  
3 12 Meisel C, Schefold JC, Pschowski R, *et al.* Granulocyte–Macrophage Colony-stimulating Factor to  
4 Reverse Sepsis-associated Immunosuppression: A Double-Blind, Randomized, Placebo-controlled  
5 Multicenter Trial. *Am J Respir Crit Care Med* 2009;180:640–8.  
6  
7 13 Gentile LF, Cuenca AG, Efron PA, *et al.* Persistent inflammation and immunosuppression: A  
8 common syndrome and new horizon for surgical intensive care. *J Trauma Acute Care Surg*  
9 2012;72:1491–501.  
10  
11 14 Angele MK, Chaudry IH. Surgical trauma and immunosuppression: pathophysiology and potential  
12 immunomodulatory approaches. *Langenbecks Arch Surg* 2005;390:333–41.  
13  
14 15 Kimura F, Shimizu H, Yoshidome H, *et al.* Immunosuppression following surgical and traumatic  
15 injury. *Surg Today* 2010;40:793–808.  
16  
17 16 Timmermans K, Kox M, Vaneker M, *et al.* Plasma levels of danger-associated molecular patterns  
18 are associated with immune suppression in trauma patients. *Intensive Care Med* 2016;42:551–61.  
19  
20 17 Gossez M, Malcus C, Demaret J, *et al.* Evaluation of a Novel Automated Volumetric Flow  
21 Cytometer for Absolute CD41 T Lymphocyte Quantitation. *Cytometry B Clin. Cytom.* 2016.  
22 10.1002/cyto.b.21360  
23  
24 18 <http://www.clinicaltrials.gov/>.  
25  
26 19 van Vught LA, Klein Klouwenberg PMC, Spitoni C, *et al.* Incidence, Risk Factors, and  
27 Attributable Mortality of Secondary Infections in the Intensive Care Unit After Admission for  
28 Sepsis. *JAMA* 2016;315:1469-79.  
29  
30 20 Duffy D, Rouilly V, Libri V, *et al.* Functional Analysis via Standardized Whole-Blood Stimulation  
31 Systems Defines the Boundaries of a Healthy Immune Response to Complex Stimuli. *Immunity*  
32 2014;40:436–50.  
33  
34 21 Poujol F, Monneret G, Friggeri A, *et al.* Flow cytometric evaluation of lymphocyte transformation  
35 test based on 5-ethynyl-2’deoxyuridine incorporation as a clinical alternative to tritiated thymidine  
36 uptake measurement. *J Immunol Methods* 2014;415:71–9.  
37  
38 22 Baker S, O’Neill B, Haddon W, *et al.* The injury severity score: a method for describing patients  
39 with multiple injuries and evaluating emergency care. *J Trauma.* 1974;14:187–96.  
40  
41 23 European Centre for Disease Prevention and Control. Point prevalence survey of  
42 healthcare-associated infections and antimicrobial use in European acute care hospitals. ECDC.  
43 2012;ISBN 978–92 – 9193–366 – 2.  
44  
45 24 Demaret J, Venet F, Friggeri A, *et al.* Marked alterations of neutrophil functions during sepsis-  
46 induced immunosuppression. *J Leukoc Biol* 2015;98:1081–90.  
47  
48 25 Venet F, Chung C-S, Kherouf H, *et al.* Increased circulating regulatory T cells  
49 (CD4+CD25+CD127–) contribute to lymphocyte anergy in septic shock patients. *Intensive Care*  
50 *Med* 2009;35:678–86.  
51  
52 26 Docke W-D. Monitoring Temporary Immunodepression by Flow Cytometric Measurement of  
53 Monocytic HLA-DR Expression: A Multicenter Standardized Study. *Clin Chem* 2005;51:2341–7.  
54  
55 27 Horowitz, Gary L, Altaie, Sousan, Boyd, James C, *et al.* CLSI C28-A3 Defining, Establishing, and  
56 Verifying Reference Intervals in the Clinical Laboratory Approved Guideline. 2008.  
57  
58 24  
59  
60

- 1  
2  
3 28 Fine JP, Gray RJ. A Proportional Hazards Model for the Subdistribution of a Competing Risk. *J*  
4 *Am Stat Assoc* 1999;94:496.  
5  
6 29 Vincent JL, Moreno R, Takala J, *et al.* The SOFA (Sepsis-related Organ Failure Assessment) score  
7 to describe organ dysfunction/failure. On behalf of the Working Group on Sepsis-Related  
8 Problems of the European Society of Intensive Care Medicine. *Intensive Care Med* 1996;22:707–  
9 10.  
10  
11 30 Le Gall JR, Lemeshow S, Saulnier F. A new Simplified Acute Physiology Score (SAPS II) based  
12 on a European/North American multicenter study. *JAMA J Am Med Assoc* 1993;270:2957–63.  
13  
14 31 TranSMART [<http://transmartfoundation.org/>].  
15  
16  
17  
18  
19  
20  
21  
22  
23  
24  
25  
26  
27  
28  
29  
30  
31  
32  
33  
34  
35  
36  
37  
38  
39  
40  
41  
42  
43  
44  
45  
46  
47  
48  
49  
50  
51  
52  
53  
54  
55  
56  
57  
58  
59  
60

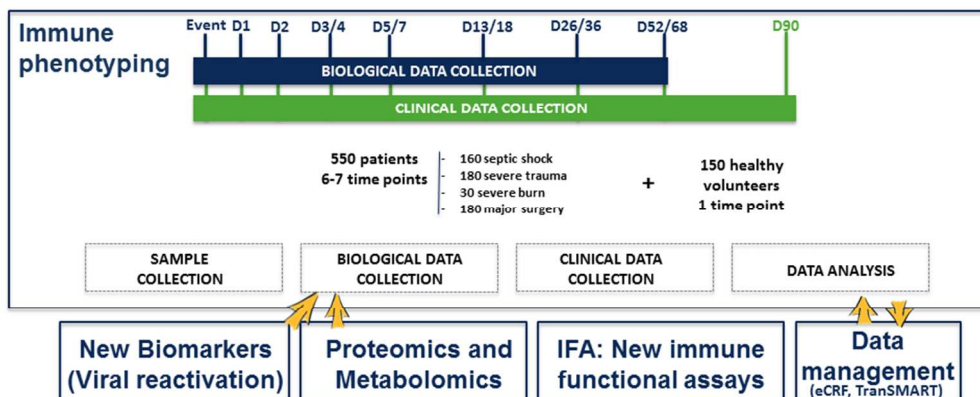

Figure 1

254x101mm (96 x 96 DPI)

Peer review only

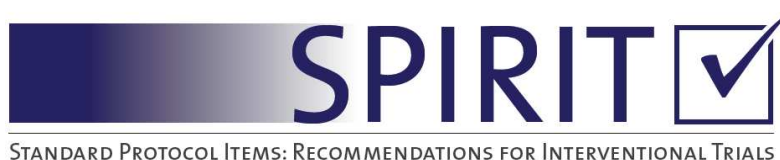

STANDARD PROTOCOL ITEMS: RECOMMENDATIONS FOR INTERVENTIONAL TRIALS

SPIRIT 2013 Checklist: Recommended items to address in a clinical trial protocol and related documents\*

| Section/item                      | Item No | Description                                                                                                                                                                                                                                                                              |     |
|-----------------------------------|---------|------------------------------------------------------------------------------------------------------------------------------------------------------------------------------------------------------------------------------------------------------------------------------------------|-----|
| <b>Administrative information</b> |         |                                                                                                                                                                                                                                                                                          |     |
| Title                             | 1       | Descriptive title identifying the study design, population, interventions, and, if applicable, trial acronym                                                                                                                                                                             | Yes |
| Trial registration                | 2a      | Trial identifier and registry name. If not yet registered, name of intended registry                                                                                                                                                                                                     | Yes |
|                                   | 2b      | All items from the World Health Organization Trial Registration Data Set                                                                                                                                                                                                                 |     |
| Protocol version                  | 3       | Date and version identifier                                                                                                                                                                                                                                                              | Yes |
| Funding                           | 4       | Sources and types of financial, material, and other support                                                                                                                                                                                                                              | Yes |
| Roles and responsibilities        | 5a      | Names, affiliations, and roles of protocol contributors                                                                                                                                                                                                                                  | Yes |
|                                   | 5b      | Name and contact information for the trial sponsor                                                                                                                                                                                                                                       | Yes |
|                                   | 5c      | Role of study sponsor and funders, if any, in study design; collection, management, analysis, and interpretation of data; writing of the report; and the decision to submit the report for publication, including whether they will have ultimate authority over any of these activities | Yes |
|                                   | 5d      | Composition, roles, and responsibilities of the coordinating centre, steering committee, endpoint adjudication committee, data management team, and other individuals or groups overseeing the trial, if applicable (see Item 21a for data monitoring committee)                         | Yes |
| <b>Introduction</b>               |         |                                                                                                                                                                                                                                                                                          |     |
| Background and rationale          | 6a      | Description of research question and justification for undertaking the trial, including summary of relevant studies (published and unpublished) examining benefits and harms for each intervention                                                                                       | Yes |
|                                   | 6b      | Explanation for choice of comparators                                                                                                                                                                                                                                                    | Yes |
| Objectives                        | 7       | Specific objectives or hypotheses                                                                                                                                                                                                                                                        | Yes |

|              |   |                                                                                                                                                                                                           |     |
|--------------|---|-----------------------------------------------------------------------------------------------------------------------------------------------------------------------------------------------------------|-----|
| Trial design | 8 | Description of trial design including type of trial (eg, parallel group, crossover, factorial, single group), allocation ratio, and framework (eg, superiority, equivalence, noninferiority, exploratory) | Yes |
|--------------|---|-----------------------------------------------------------------------------------------------------------------------------------------------------------------------------------------------------------|-----|

### Methods: Participants, interventions, and outcomes

|                      |     |                                                                                                                                                                                                                                                                                                                                                                                |     |
|----------------------|-----|--------------------------------------------------------------------------------------------------------------------------------------------------------------------------------------------------------------------------------------------------------------------------------------------------------------------------------------------------------------------------------|-----|
| Study setting        | 9   | Description of study settings (eg, community clinic, academic hospital) and list of countries where data will be collected. Reference to where list of study sites can be obtained                                                                                                                                                                                             | Yes |
| Eligibility criteria | 10  | Inclusion and exclusion criteria for participants. If applicable, eligibility criteria for study centres and individuals who will perform the interventions (eg, surgeons, psychotherapists)                                                                                                                                                                                   | Yes |
| Interventions        | 11a | Interventions for each group with sufficient detail to allow replication, including how and when they will be administered                                                                                                                                                                                                                                                     | NA  |
|                      | 11b | Criteria for discontinuing or modifying allocated interventions for a given trial participant (eg, drug dose change in response to harms, participant request, or improving/worsening disease)                                                                                                                                                                                 | NA  |
|                      | 11c | Strategies to improve adherence to intervention protocols, and any procedures for monitoring adherence (eg, drug tablet return, laboratory tests)                                                                                                                                                                                                                              | NA  |
|                      | 11d | Relevant concomitant care and interventions that are permitted or prohibited during the trial                                                                                                                                                                                                                                                                                  | Yes |
| Outcomes             | 12  | Primary, secondary, and other outcomes, including the specific measurement variable (eg, systolic blood pressure), analysis metric (eg, change from baseline, final value, time to event), method of aggregation (eg, median, proportion), and time point for each outcome. Explanation of the clinical relevance of chosen efficacy and harm outcomes is strongly recommended | Yes |
| Participant timeline | 13  | Time schedule of enrolment, interventions (including any run-ins and washouts), assessments, and visits for participants. A schematic diagram is highly recommended (see Figure)                                                                                                                                                                                               | Yes |
| Sample size          | 14  | Estimated number of participants needed to achieve study objectives and how it was determined, including clinical and statistical assumptions supporting any sample size calculations                                                                                                                                                                                          | Yes |
| Recruitment          | 15  | Strategies for achieving adequate participant enrolment to reach target sample size                                                                                                                                                                                                                                                                                            | No  |

### Methods: Assignment of interventions (for controlled trials)

## Allocation:

|                                  |     |                                                                                                                                                                                                                                                                                                                                                          |    |
|----------------------------------|-----|----------------------------------------------------------------------------------------------------------------------------------------------------------------------------------------------------------------------------------------------------------------------------------------------------------------------------------------------------------|----|
| Sequence generation              | 16a | Method of generating the allocation sequence (eg, computer-generated random numbers), and list of any factors for stratification. To reduce predictability of a random sequence, details of any planned restriction (eg, blocking) should be provided in a separate document that is unavailable to those who enrol participants or assign interventions | NA |
| Allocation concealment mechanism | 16b | Mechanism of implementing the allocation sequence (eg, central telephone; sequentially numbered, opaque, sealed envelopes), describing any steps to conceal the sequence until interventions are assigned                                                                                                                                                | NA |
| Implementation                   | 16c | Who will generate the allocation sequence, who will enrol participants, and who will assign participants to interventions                                                                                                                                                                                                                                | NA |
| Blinding (masking)               | 17a | Who will be blinded after assignment to interventions (eg, trial participants, care providers, outcome assessors, data analysts), and how                                                                                                                                                                                                                | NA |
|                                  | 17b | If blinded, circumstances under which unblinding is permissible, and procedure for revealing a participant's allocated intervention during the trial                                                                                                                                                                                                     | NA |

**Methods: Data collection, management, and analysis**

|                         |     |                                                                                                                                                                                                                                                                                                                                                                                                              |     |
|-------------------------|-----|--------------------------------------------------------------------------------------------------------------------------------------------------------------------------------------------------------------------------------------------------------------------------------------------------------------------------------------------------------------------------------------------------------------|-----|
| Data collection methods | 18a | Plans for assessment and collection of outcome, baseline, and other trial data, including any related processes to promote data quality (eg, duplicate measurements, training of assessors) and a description of study instruments (eg, questionnaires, laboratory tests) along with their reliability and validity, if known. Reference to where data collection forms can be found, if not in the protocol | Yes |
|                         | 18b | Plans to promote participant retention and complete follow-up, including list of any outcome data to be collected for participants who discontinue or deviate from intervention protocols                                                                                                                                                                                                                    | Yes |
| Data management         | 19  | Plans for data entry, coding, security, and storage, including any related processes to promote data quality (eg, double data entry; range checks for data values). Reference to where details of data management procedures can be found, if not in the protocol                                                                                                                                            | Yes |
| Statistical methods     | 20a | Statistical methods for analysing primary and secondary outcomes. Reference to where other details of the statistical analysis plan can be found, if not in the protocol                                                                                                                                                                                                                                     | Yes |
|                         | 20b | Methods for any additional analyses (eg, subgroup and adjusted analyses)                                                                                                                                                                                                                                                                                                                                     | Yes |

|                                 |     |                                                                                                                                                                                                                                                                                                                                       |     |
|---------------------------------|-----|---------------------------------------------------------------------------------------------------------------------------------------------------------------------------------------------------------------------------------------------------------------------------------------------------------------------------------------|-----|
|                                 | 20c | Definition of analysis population relating to protocol non-adherence (eg, as randomised analysis), and any statistical methods to handle missing data (eg, multiple imputation)                                                                                                                                                       | Yes |
| <b>Methods: Monitoring</b>      |     |                                                                                                                                                                                                                                                                                                                                       |     |
| Data monitoring                 | 21a | Composition of data monitoring committee (DMC); summary of its role and reporting structure; statement of whether it is independent from the sponsor and competing interests; and reference to where further details about its charter can be found, if not in the protocol. Alternatively, an explanation of why a DMC is not needed | NA  |
|                                 | 21b | Description of any interim analyses and stopping guidelines, including who will have access to these interim results and make the final decision to terminate the trial                                                                                                                                                               | NA  |
| Harms                           | 22  | Plans for collecting, assessing, reporting, and managing solicited and spontaneously reported adverse events and other unintended effects of trial interventions or trial conduct                                                                                                                                                     | Yes |
| Auditing                        | 23  | Frequency and procedures for auditing trial conduct, if any, and whether the process will be independent from investigators and the sponsor                                                                                                                                                                                           | Yes |
| <b>Ethics and dissemination</b> |     |                                                                                                                                                                                                                                                                                                                                       |     |
| Research ethics approval        | 24  | Plans for seeking research ethics committee/institutional review board (REC/IRB) approval                                                                                                                                                                                                                                             | Yes |
| Protocol amendments             | 25  | Plans for communicating important protocol modifications (eg, changes to eligibility criteria, outcomes, analyses) to relevant parties (eg, investigators, REC/IRBs, trial participants, trial registries, journals, regulators)                                                                                                      | Yes |
| Consent or assent               | 26a | Who will obtain informed consent or assent from potential trial participants or authorised surrogates, and how (see Item 32)                                                                                                                                                                                                          | Yes |
|                                 | 26b | Additional consent provisions for collection and use of participant data and biological specimens in ancillary studies, if applicable                                                                                                                                                                                                 | Yes |
| Confidentiality                 | 27  | How personal information about potential and enrolled participants will be collected, shared, and maintained in order to protect confidentiality before, during, and after the trial                                                                                                                                                  | Yes |
| Declaration of interests        | 28  | Financial and other competing interests for principal investigators for the overall trial and each study site                                                                                                                                                                                                                         | Yes |
| Access to data                  | 29  | Statement of who will have access to the final trial dataset, and disclosure of contractual agreements that limit such access for investigators                                                                                                                                                                                       | Yes |

|    |                   |     |                                                                 |     |
|----|-------------------|-----|-----------------------------------------------------------------|-----|
| 1  |                   |     |                                                                 |     |
| 2  | Ancillary and     | 30  | Provisions, if any, for ancillary and post-trial care, and for  | NA  |
| 3  | post-trial care   |     | compensation to those who suffer harm from trial participation  |     |
| 4  |                   |     |                                                                 |     |
| 5  | Dissemination     | 31a | Plans for investigators and sponsor to communicate trial        | Yes |
| 6  | policy            |     | results to participants, healthcare professionals, the public,  |     |
| 7  |                   |     | and other relevant groups (eg, via publication, reporting in    |     |
| 8  |                   |     | results databases, or other data sharing arrangements),         |     |
| 9  |                   |     | including any publication restrictions                          |     |
| 10 |                   |     |                                                                 |     |
| 11 |                   | 31b | Authorship eligibility guidelines and any intended use of       | Yes |
| 12 |                   |     | professional writers                                            |     |
| 13 |                   |     |                                                                 |     |
| 14 |                   | 31c | Plans, if any, for granting public access to the full protocol, | No  |
| 15 |                   |     | participant-level dataset, and statistical code                 |     |
| 16 |                   |     |                                                                 |     |
| 17 |                   |     |                                                                 |     |
| 18 | <b>Appendices</b> |     |                                                                 |     |
| 19 |                   |     |                                                                 |     |
| 20 | Informed          | 32  | Model consent form and other related documentation given to     | Yes |
| 21 | consent           |     | participants and authorised surrogates                          |     |
| 22 | materials         |     |                                                                 |     |
| 23 |                   |     |                                                                 |     |
| 24 | Biological        | 33  | Plans for collection, laboratory evaluation, and storage of     | Yes |
| 25 | specimens         |     | biological specimens for genetic or molecular analysis in the   |     |
| 26 |                   |     | current trial and for future use in ancillary studies, if       |     |
| 27 |                   |     | applicable                                                      |     |
| 28 |                   |     |                                                                 |     |

---

29 \*It is strongly recommended that this checklist be read in conjunction with the SPIRIT 2013  
 30 Explanation & Elaboration for important clarification on the items. Amendments to the  
 31 protocol should be tracked and dated. The SPIRIT checklist is copyrighted by the SPIRIT  
 32 Group under the Creative Commons "[Attribution-NonCommercial-NoDerivs 3.0 Unported](https://creativecommons.org/licenses/by-nc-nd/3.0/)"  
 33 license.  
 34  
 35  
 36  
 37  
 38  
 39  
 40  
 41  
 42  
 43  
 44  
 45  
 46  
 47  
 48  
 49  
 50  
 51  
 52  
 53  
 54  
 55  
 56  
 57  
 58  
 59  
 60



# BMJ Open

**THE Reanimation Low Immune Status Markers (REALISM)  
PROJECT: A PROTOCOL FOR BROAD CHARACTERIZATION  
AND FOLLOW-UP OF INJURY-INDUCED  
IMMUNOSUPPRESSION IN Intensive Care Unit (ICU)  
CRITICALLY-ILL PATIENTS**

|                                    |                                                                                                                                                                                                                                                                                                                                                                                                                                                                                                                                                                                                                                                                                                                                                                  |
|------------------------------------|------------------------------------------------------------------------------------------------------------------------------------------------------------------------------------------------------------------------------------------------------------------------------------------------------------------------------------------------------------------------------------------------------------------------------------------------------------------------------------------------------------------------------------------------------------------------------------------------------------------------------------------------------------------------------------------------------------------------------------------------------------------|
| Journal:                           | <i>BMJ Open</i>                                                                                                                                                                                                                                                                                                                                                                                                                                                                                                                                                                                                                                                                                                                                                  |
| Manuscript ID                      | bmjopen-2016-015734.R1                                                                                                                                                                                                                                                                                                                                                                                                                                                                                                                                                                                                                                                                                                                                           |
| Article Type:                      | Protocol                                                                                                                                                                                                                                                                                                                                                                                                                                                                                                                                                                                                                                                                                                                                                         |
| Date Submitted by the Author:      | 22-Feb-2017                                                                                                                                                                                                                                                                                                                                                                                                                                                                                                                                                                                                                                                                                                                                                      |
| Complete List of Authors:          | <p>ROL, Mary-Luz; BIOASTER<br/>Venet, Fabienne; Hospices Civils de Lyon, Laboratoire d'Immunologie<br/>RIMMELE, Thomas; Hospices Civils de Lyon, Département d'Anesthésie et<br/>de Réanimation<br/>MOUCADEL, Virginie; bioMerieux<br/>CORTEZ, Pierre; SANOFI-Aventis<br/>QUEMENEUR, Laurence; Sanofi Pasteur MSD SNC<br/>GARDINER, David; GlaxoSmithKline USA<br/>GRIFFITHS, Andrew; ESPCI ParisTech<br/>PACHOT, Alexandre; bioMerieux, EA7426 "Pathophysiology of Injury<br/>Induced Immunosuppression (PI3)"<br/>Textoris, Julien; bioMerieux, EA7426 "Pathophysiology of Injury Induced<br/>Immunosuppression (PI3)"; Hospices Civils de Lyon, Département<br/>d'Anesthésie et de Réanimation<br/>Monneret, G; Centre Hospitalier Universitaire de Lyon,</p> |
| <b>Primary Subject<br>Heading</b>: | Diagnostics                                                                                                                                                                                                                                                                                                                                                                                                                                                                                                                                                                                                                                                                                                                                                      |
| Secondary Subject Heading:         | Immunology (including allergy), Intensive care, Surgery                                                                                                                                                                                                                                                                                                                                                                                                                                                                                                                                                                                                                                                                                                          |
| Keywords:                          | Injury-Induced immunosuppression, INTENSIVE & CRITICAL CARE, Innate immunity, Adaptive immunity, Biomarkers, Health Care Associated Infections                                                                                                                                                                                                                                                                                                                                                                                                                                                                                                                                                                                                                   |
|                                    |                                                                                                                                                                                                                                                                                                                                                                                                                                                                                                                                                                                                                                                                                                                                                                  |

SCHOLARONE™  
Manuscripts

1  
2  
3 **THE Reanimation Low Immune Status Markers (REALISM) PROJECT:**  
4  
5 **A PROTOCOL FOR BROAD CHARACTERIZATION AND FOLLOW-**  
6  
7 **UP OF INJURY-INDUCED IMMUNOSUPPRESSION IN Intensive Care**  
8  
9 **Unit (ICU) CRITICALLY-ILL PATIENTS**  
10  
11  
12  
13  
14  
15

16 Mary Luz ROL<sup>1\*</sup>, Fabienne VENET<sup>2,3\*</sup>, Thomas RIMMELE<sup>3,4</sup>, Virginie MOUCADEL<sup>5</sup>, Pierre  
17 CORTEZ<sup>6</sup>, Laurence QUEMENEUR<sup>7</sup>, David GARDINER<sup>8</sup>, Andrew GRIFFITHS<sup>9</sup>, Alexandre  
18 PACHOT<sup>3</sup>, Julien TEXTORIS<sup>3,4</sup>, Guillaume MONNERET<sup>2,3</sup>, on behalf of the REALISM study  
19 group  
20  
21  
22  
23

24  
25 <sup>1</sup> BIOASTER Technology Research Institute, Lyon, France.  
26

27  
28 <sup>2</sup> Immunology Laboratory, E. Herriot Hospital, Hospices Civils de Lyon; University Claude Bernard  
29 Lyon 1; Lyon, France.  
30

31  
32 <sup>3</sup> EA 7426 “Pathophysiology of Injury-induced immunosuppression”, Université Claude Bernard  
33 Lyon 1 - Hospices Civils de Lyon - bioMérieux, E. Herriot Hospital; Lyon, France.  
34

35  
36 <sup>4</sup> Anesthesiology and Critical Care Medicine, Edouard Herriot Hospital, Hospices Civils de Lyon;  
37 University Claude Bernard Lyon 1; Lyon, France.  
38

39  
40 <sup>5</sup> BioMérieux SA, Medical Diagnostic Discovery Department, Marcy L’Etoile, France.  
41

42  
43 <sup>6</sup> Sanofi Aventis R&D, Chilly-Mazarin, France.  
44

45  
46 <sup>7</sup> Sanofi-Pasteur SA, Lyon, France  
47

48  
49 <sup>8</sup> GlaxoSmithKline, Collegeville, PA, US  
50

51  
52 <sup>9</sup> ESPCI Paris, PSL Research University, 10 Rue Vauquelin, 75005 Paris, France.  
53

54  
55 \*Both authors contributes equally to the work  
56

57  
58  
59  
60

1  
2  
3 **Corresponding Author:** Julien TEXTORIS

4 Laboratoire Commun de Recherche,

5 Pavillon P, Hôpital Edouard Herriot, 5 place d'Arsonval, 69437 LYON Cedex 03, France.

6  
7 Tel: +33 426 038 747

8  
9 Email: julien.textoris@biomerieux.com)

10  
11  
12  
13  
14 **Manuscript word count:** 3627 words

## ABSTRACT

**Introduction.** The host response to septic shock is dynamic and complex. A sepsis-induced immunosuppression phase has recently been acknowledged and linked to bad outcomes and increased healthcare costs. Moreover, a marked suppression of the immune response has also been partially described in patients hospitalized in ICU for severe trauma or burns. It has been hypothesized that immune monitoring could enable identification of patients who might most benefit from novel, adjunctive immune stimulating therapies. However, there is currently neither a clear definition for such injury-induced immunosuppression nor a stratification biomarker compatible with clinical constraints.

**Methods and Analysis.** We set up a prospective, longitudinal single-center clinical study to determine the incidence, severity and persistency of innate and adaptive immune alterations in ICU patients. We optimized a workflow to describe and follow the immuno-inflammatory status of 550 patients (septic shock, severe trauma/burn and major surgery) during the first 2 months after their initial injury. On each time point, two immune functional tests will be performed to determine whole blood TNF-alpha production in response to *ex-vivo* Lipopolysaccharide stimulation and the T lymphocyte proliferation in response to Phytohaemagglutinin. In addition, a complete immunophenotyping using flow cytometry including monocyte HLA-DR expression and lymphocyte subsets will be obtained. New markers (i.e. levels of expression of host mRNA and viral reactivation) will be also evaluated. Reference intervals will be determined from a cohort of 150 age-matched healthy volunteers. This clinical study will provide, for the first time, data describing the immune status of severe ICU patients over time.

**Ethics and dissemination.** Ethical approval has been obtained from the Institutional Review Board (#69HCL15\_0379) and the French National Security agency for drugs and health related products. Results will be disseminated through presentations at scientific meetings and publications in peer-reviewed journals.

1  
2  
3 **Trial registration.** Clinicaltrials.gov Registration number: NCT02638779.  
4

5 **KEYWORDS:** Injury-induced immunosuppression; Intensive Care Unit ; Innate immunity; Adaptive  
6  
7 immunity; Biomarkers; Health Care Associated infections.  
8  
9

10  
11  
12  
13  
14 **Strengths and limitations of this study:**  
15

- 16 • First prospective study to provide a broad immune status characterization in a large  
17 cohort of ICU patients.
- 18 • Mid-term assessment (D60) of the immune status in ICU patients, which has never  
19 been done before.
- 20 • Long term follow up will not addressed here and should be examined in future  
21 studies.
- 22 • New biomarkers of the immune status will be assessed in comparison to standardized  
23 tools and immune functional assays.
- 24 • Whether such biomarkers would permit to stratify patients for immunomodulatory  
25 treatments should be addressed in future studies.
- 26 • The role of host genomics, microbiota, as well as checkpoint inhibitors expression  
27 will not be assessed in this study.  
28  
29  
30  
31  
32  
33  
34  
35  
36  
37  
38  
39  
40  
41  
42  
43  
44  
45  
46  
47  
48  
49  
50  
51  
52  
53  
54  
55  
56  
57  
58  
59  
60

## INTRODUCTION

Sepsis is a major health problem and the main etiology for ICU admissions [1,2]. Its incidence is increasing over the years due to several factors, including a better awareness and an aging population [3]. Hospital admissions for sepsis have thus overtaken those for stroke and myocardial infarction [4]. Despite advances on its management, mortality of sepsis has remained stable over the last 20 years, reaching 30-40% in case of septic shock, the most severe form, and it is the leading cause of death in ICU.

Sepsis is a severe infection, defined as a “life-threatening organ dysfunction caused by a dysregulated host response to infection” [5]. Besides circulatory and metabolic abnormalities, the multifaceted host response to the invading pathogen is amplified by comorbid conditions [6,7]. It is now acknowledged that the pro-inflammatory response, which can lead to organ failure, comes with a compensatory anti-inflammatory response. Recovery occurs when inflammation resolves quickly. However, in numerous patients, the anti-inflammatory response lingers on and leads to an immunosuppression state, associated with secondary infections, and increased morbidity and mortality [8]. This sepsis-induced immunosuppression could explain the failure of several previous clinical trials and support new innovative trials testing immune adjuvant drugs in septic shock [9].

Therefore, several studies and case reports now support the rational of boosting the immune system, in order to avoid the occurrence of health-care associated infection and therefore reduce the associated morbidity [10,11]. However, to avoid reproducing the errors from the past, such innovative treatments should be administered only to those individuals identified as immunosuppressed [11]. Some studies have already demonstrated that the concept of biomarker-guided therapeutic stratification can lead to clinical improvements [12].

A marked immunosuppression has been partially described in other patients admitted to the ICU for severe trauma/burns and other major surgeries [13–16]. In these “sterile” injuries, signs of injury-induced immune alterations have also been associated with increased susceptibility to secondary infections and mortality.

1  
2  
3 Given the complexity and heterogeneity of ICU patients, it is unlikely that any single biomarker will  
4 be sufficient to describe and diagnose injury-induced immunosuppression. On the contrary, a panel of  
5 validated biomarkers may bring enough information to accomplish such complex endeavor.  
6  
7  
8  
9

## 10 11 **Rationale of the study** 12

13  
14 From a clinical perspective, no specific clinical signs or symptoms are associated with a state of  
15 altered immune response to allow prospective identification of at risk patients. Further, the outcomes  
16 of sustained immunosuppression are best defined by clinical relevant endpoints such as the occurrence  
17 of opportunistic and secondary infections. However, waiting for such a health-care associated  
18 infection to occur does not facilitate implementation of preventive strategies. Thus, diagnosis will rely  
19 on biomarkers.  
20

21 From a biological perspective, sepsis-induced immunosuppression may be best identified by immune  
22 *functional* assays (such as cytokine release or lymphocytes proliferation after *ex-vivo* stimulation), or  
23 cell count parameters (such as, number of lymphocytes or level of expression of mHLA-DR) but both  
24 approaches present drawbacks. Indeed, such functional assays are not suitable to stratify patients in a  
25 prospective interventional clinical trial due to (1) the long time to results (up to 5 days for  
26 lymphocytes proliferation), and (2) poor reproducibility due to standardization issues and  
27 cumbersome technique. Due to such complexity, these reference tests are rarely performed in clinical  
28 studies evaluating biomarkers associated with deleterious outcomes in ICU.  
29

30 On the other hand, HLA-DR expression on monocytes is currently the best biomarker available for  
31 such a routine use [17], and is being employed for patient stratification in a large multicenter  
32 interventional trial assessing the administration of GM-CSF in patients with septic shock [18].  
33

34 However, its measurement requires flow cytometry analysis within 4 hours of blood sampling which  
35 may not be available in all centers, making interlaboratory standardization challenging.  
36

37 As a consequence of the previously discussed challenges, numerous biomarkers proposed to monitor  
38 injury-induced immune alterations have yet to be compared to these *reference* assays.  
39  
40  
41

## Hypothesis

Although several studies have shown an association between markers related to the immune system (e.g. HLA-DR) and the occurrence of healthcare-associated infections in septic patients [14,15,19], we still do not have a clear and operational definition of the immune deficiency that occurs in severely injured ICU patients. Precise description of injury-induced immunosuppression incidence and its characteristics are lacking. In the REALISM (REAnimation Low Immune Status Markers) project, we propose to broadly assess immune parameters over time and to correlate these findings with clinical epidemiologic data and outcomes in order to identify and define immunosuppression in ICU patients both in terms of magnitude and time duration.

To this aim, we have established two standardized functional immune assays (whole blood TNF $\alpha$  release after ex-vivo stimulation with LPS (Lipopolysaccharides) [20] and lymphocyte proliferation in response to ex-vivo stimulation with PHA (Phytohaemagglutinin) [21]). ***We propose to define the status of immunosuppression on the basis of an abnormal result (values outside the reference intervals) obtained in at least one of the two “reference” test.***

The REALISM project aims to provide a validated operational definition of injury-induced immunosuppression predicting clinically relevant outcomes. This will facilitate development of new tools and biomarkers with the goal of introducing diagnosis of immune suppression into routine clinical practice and allow patient stratification for the evaluation of new individual immunotherapies. It may also enable the identification of new targets and the development of new innovative therapeutics to treat ICU patients and prevent opportunistic infections in the future

## Primary Aim

The primary objective of the study is to determine the incidence of injury-induced immunosuppression in ICU patients, during the first two months after injury.



## Secondary Aims

The secondary objectives of the study are:

- To describe the occurrence of immunosuppression, its depth and impact on innate and adaptive immune responses, and its evolution during the first 2 months after injury.
- To assess the strength of the proposed definition, in particular by evaluating its association with secondary infections and mortality.
- To assess the accuracy of new biomarkers and immune functional assays to diagnose immunosuppression.

These new biomarkers / immune functional assays could therefore replace assays such as the T-cell proliferation assay, the current protocol of which is not suited to the routine management of ICU patients. We therefore expect to provide data to validate simpler diagnostic tools to determine and follow the immune status in hospitalized patients.

## METHODS AND ANALYSIS

REALISM is a prospective longitudinal, single-center observational study, conducted in the anesthesiology and intensive care department at the Edouard Herriot hospital (University hospital, Lyon France, capacity of approximately 1,000 beds).

### Study population

REALISM will include healthy volunteers (n=150) and patients at risk of injury-induced immunosuppression: (1) septic shock patients (n=160); (2) severe trauma patients (n=180); (3) severe burns patients (n=30); and (4) patients admitted to the ICU after major surgery (n=180).

Septic shock inclusion criteria follow the current definition [5] and require a state of shock defined by vasopressors administration and plasma lactate level above 2 mmol/L (18 mg/dL). An infection must be suspected, and microbiological sampling should have been performed, along with the administration of antimicrobials. Only primary septic shock will be considered (vasopressors should have been started within the first 48hours after ICU admission) [5].

Patients with severe trauma, defined by an injury severity score (ISS, Baker *et al.*, 1974) > 15 [22], will be included in the study. As we hypothesized that the depth of immunosuppression might be related to severity, we will limit the group of patients between ISS = [15-25] to 90 patients to ensure at least 50% of the cohort includes patients with an ISS > 25. Severe burn patients will be selected for inclusion based on a total burn surface area over 30%.

Surgical patients will be screened according to the planned surgical procedure. This study will include patients undergoing: 1) eso-gastrectomy; (2) Bricker's bladder resection (total bladder resection with reconstruction from small bowel); (3) cephalic pancreaticoduodenectomy (Whipple's procedure); (4) abdominal aortic aneurysm surgery by laparotomy.

Exclusion criteria are mainly related to factors that might impact the immune status and bias the results such as: severe neutropenia (neutrophil count  $<0.5$  G/L), administration of immunosuppressive therapy, corticosteroids (IV if oral administration), use of therapeutic antibodies (such as anti-TNF alpha), onco-hematological disease (e.g. lymphoma, leukemia) under treatment or treated within 5 years before inclusion, end of chemotherapy within the 6 months prior to inclusion date. Patients with congenital/hereditary or acquired immune deficiency (for example severe combined immunodeficiency, HIV or AIDS, at any stage), and patients that have received extra-corporeal circulation in the month preceding inclusion will be excluded as well.

Considering the possible influence of gender bias on measured parameters, we will recruit healthy donors from both genders, following the age and gender distribution of the French population.

Complete lists of the inclusion and exclusion criteria for patients and healthy volunteers are presented in Table 1 and Table 2 respectively.

| <b>Table 1. Inclusion and exclusion criteria for patients</b>                                                                                                    |
|------------------------------------------------------------------------------------------------------------------------------------------------------------------|
| <b>Inclusion criteria</b>                                                                                                                                        |
| Male or female aged over 18 years                                                                                                                                |
| Patient or next of kin having been informed of the conditions of the study and having signed the informed consent form                                           |
| Patient hospitalized for:                                                                                                                                        |
| <b>Septic shock, defined by:</b>                                                                                                                                 |
| Infection site suspected, and microbiological analysis sampling carried out                                                                                      |
| Vasopressor therapy needed to elevate MAP (Mean Arterial Pressure) $\geq 65$ mm Hg and lactate $> 2$ mmol/L (18 mg/dL) despite adequate fluid resuscitation [26] |
| Noradrenaline $> 0.20$ $\mu\text{g}/\text{kg}/\text{min}$ for at least 2 hours                                                                                   |
| Noradrenaline started within 48 hours after ICU admission                                                                                                        |
| <b>Serious trauma, defined by:</b>                                                                                                                               |
| Patient admitted directly to the recruiting ICU                                                                                                                  |
| Injury Severity Score Baker <i>et al.</i> , 1974 $> 15$ [22]                                                                                                     |
| <b>Severe burns, defined by:</b>                                                                                                                                 |
| Total burned surface area $> 30\%$                                                                                                                               |
| <b>Major surgery, defined by:</b>                                                                                                                                |

|    |                                                                                                     |
|----|-----------------------------------------------------------------------------------------------------|
| 1  |                                                                                                     |
| 2  |                                                                                                     |
| 3  |                                                                                                     |
| 4  | Surgery set for one of the following indications: (i) eso-gastrectomy; (ii) Bricker's bladder       |
| 5  | resection (total bladder resection with reconstruction from small bowel); (iii) cephalic            |
| 6  | pancreaticoduodenectomy (Whipple's procedure); (iv) abdominal aortic aneurysm surgery by            |
| 7  | laparotomy. Categories i to iii concern management of solid tumors, while category iv concerns      |
| 8  | non-cancerous pathologies                                                                           |
| 9  |                                                                                                     |
| 10 | Induction of anesthesia before 11 am (to permit same day processing of all samples)                 |
| 11 |                                                                                                     |
| 12 | <b>Exclusion criteria</b>                                                                           |
| 13 | Patient with severe neutropenia (neutrophil count <0.5 G/L)                                         |
| 14 | Patients receiving immunosuppressive therapy                                                        |
| 15 | Corticosteroids (IV or Per os).                                                                     |
| 16 | Use of therapeutic antibodies                                                                       |
| 17 |                                                                                                     |
| 18 | Onco-hematological disease (ex. Lymphoma, leukemia...) under treatment, or treated within 5 years   |
| 19 | before inclusion                                                                                    |
| 20 |                                                                                                     |
| 21 | End of chemotherapy within the 6 months prior to inclusion date                                     |
| 22 |                                                                                                     |
| 23 | Patient with innate or acquired immune deficiency (for example severe combined                      |
| 24 | immunodeficiency, HIV or AIDS, any stage)                                                           |
| 25 | Patients with a "do not resuscitate order" or a "withdraw of care" decision, at time of inclusion   |
| 26 | Patient whose anticipated duration of hospitalization in the ICU is estimated at less than 48 hours |
| 27 | Participation in any interventional study                                                           |
| 28 | Extra-corporeal circulation in the month preceding inclusion in the case of cardiac surgery         |
| 29 | Pregnant or breastfeeding women                                                                     |
| 30 |                                                                                                     |
| 31 | Patient with no social security insurance, with restricted liberty or under legal protection        |
| 32 |                                                                                                     |
| 33 |                                                                                                     |

|    |                                                                                    |
|----|------------------------------------------------------------------------------------|
| 34 | <b>Table 2: Inclusion and exclusion criteria for healthy volunteers</b>            |
| 35 |                                                                                    |
| 36 | <b>Inclusion criteria</b>                                                          |
| 37 | Male or female aged over 18 years                                                  |
| 38 | Normal clinical examination                                                        |
| 39 | Signed informed consent form                                                       |
| 40 | Person with social security insurance                                              |
| 41 |                                                                                    |
| 42 |                                                                                    |
| 43 | <b>Exclusion criteria</b>                                                          |
| 44 | Person with an infectious syndrome during the last 90 days                         |
| 45 | Extreme physical stress within the last week                                       |
| 46 |                                                                                    |
| 47 | <b>Person having received within the last 90 days, a treatment based on:</b>       |
| 48 | Antivirals                                                                         |
| 49 | Antibiotics                                                                        |
| 50 | Antiparasitics                                                                     |
| 51 | Antifungals                                                                        |
| 52 |                                                                                    |
| 53 | Person having received within the last 15 days, a treatment based on non-steroidal |
| 54 | anti-inflammatory drugs (NSAIDs)                                                   |
| 55 |                                                                                    |
| 56 | <b>Person having received within the last 24 months, a treatment based on:</b>     |
| 57 |                                                                                    |
| 58 |                                                                                    |
| 59 |                                                                                    |
| 60 |                                                                                    |

|                                                                |
|----------------------------------------------------------------|
| Immunosuppressive therapy                                      |
| Corticosteroids (IV or Per os)                                 |
| Therapeutic antibodies                                         |
| Chemotherapy                                                   |
| <b>History of :</b>                                            |
| Innate or acquired immune deficiency                           |
| Hematological disease                                          |
| Solid tumor                                                    |
| Severe chronic disease                                         |
| Surgery or hospitalization within the last 2 years             |
| Pregnancy within the last year                                 |
| Participation to a phase I clinical assay during the last year |
| Participation to a phase I clinical assay during the last year |
| Pregnant or breastfeeding women                                |
| Person with restricted liberty or under legal protection       |

## Sampling schedule

Samples and clinical data will be collected 3 to 4 times within the first week (early time-points) with the aim to evaluate the modulation of the immune status early after injury. Samples will be collected at day 1 (the morning following injury), at day 2 (for the severe trauma group) and at day 3/4 and day 5/7 (Table 3). Samples will also be collected before surgery, at day 0, as surgical patients are the only group for which sampling can be performed before injury. Additional samples will be collected during late time points to evaluate the recovery of the immune status, at day 14 (between day 13 to 18), day 28 (between day 26 to 36) and day 60 (between day 52 to 68), depending on patient availability and technical constraints (Figure 1). Total volume of sampling will be 30 mL at each time point.

## Definition of Immunosuppression

The REALISM project will monitor the immune function of the patients and healthy volunteers using two standardized immune functional tests: one reference test to evaluate the innate immune response (whole blood production of TNF-alpha in response to ex vivo stimulation by LPS) and a second reference test for the adaptive immune response (the lymphocyte proliferation in response to ex vivo T cell stimulation with PHA). Immunosuppression will be defined in comparison to the values as

1  
2  
3 obtained in a group of healthy volunteers for the two reference tests using the following methodology.  
4  
5 First, reference intervals (RI) will be derived from the independent set of healthy volunteers. Second,  
6  
7 immunosuppression will be defined in a patient when an abnormal result (value outside the reference  
8  
9 intervals) is obtained in at least one of the two “reference” tests over at least two consecutive time  
10  
11 points

## 12 13 14 15 **Definition of Secondary infection**

16  
17 During the ICU stay, patients will be screened daily for exposure to invasive devices (intubation,  
18  
19 indwelling urinary catheter, and central venous line) and occurrence of secondary infection.  
20  
21 Information referent to infections will be collected, reviewed and validated by a dedicated  
22  
23 adjudication committee, composed of 3 physicians not involved in the recruitment of the patients with  
24  
25 confirmation of secondary infection made according to the definitions used by the European center for  
26  
27 disease prevention and control [23] and the Infectious Diseases Society of America.  
28  
29  
30  
31

## 32 33 **Immune functional assays**

### 34 35 *Innate immune response: TNF- $\alpha$ release after LPS whole blood stimulation*

36  
37 Innate immune response will be evaluated by measuring the production of TNF- $\alpha$  in response to *ex*  
38  
39 *vivo* stimulation of whole blood by LPS [20]. The stimulation will be performed through the use of  
40  
41 standardized TruCulture<sup>®</sup> tubes from MYRIAD RBM (MYRIAD RBM; Austin, USA) (the  
42  
43 concentration, quality and activity of the LPS is guaranteed by the manufacturer MYRIAD RBM)  
44  
45 [20]. The tubes contain the medium alone (Null) or the medium with LPS 100 ng/ml (LPS from *E.coli*  
46  
47 O55:B5) (LPS-R; Null-R; MYRIAD RBM). The blood samples will be collected on heparin and  
48  
49 transported to the laboratory where 1 ml of heparinized blood will be transferred to each TruCulture<sup>®</sup>  
50  
51 tube and incubated for 24 hours at 37°C. Following incubation, the supernatant (medium+plasma)  
52  
53 will be collected using a separation valve (according to manufacturer instructions) and stored at -80°C  
54  
55  
56  
57  
58  
59  
60

1  
2  
3 until batch quantification of TNF- $\alpha$  by ELISA (BE55001; BL International-Tecan; Männedorf,  
4  
5 Switzerland).

#### 10 *Adaptive immune response: T lymphocyte proliferation after ex vivo PBMCs mitogenic stimulation*

11 Adaptive immune response will be assessed by measuring T lymphocyte proliferation in response to  
12 *ex vivo* stimulation with a mitogen [21]. Briefly, Peripheral Blood Mononuclear Cells (PBMC)  
13 isolated by Ficoll density gradient centrifugation (U-04; Eurobio; Les Ulis, France) will be stimulated  
14 with PHA at 4 $\mu$ g/mL (HA16; Remel; Lenexa, USA), at 37°C for 72 hours. Following incubation, the  
15 cells will be harvested and cell's proliferation will be determined by the incorporation of EdU (5-  
16 ethynyl-2'-deoxyuridine, 10 $\mu$ M for 2h) in T cells using the commercial kit Click-It EdU AF488 flow  
17 kit (C10420, Life Technologies, Carlsbad, California, USA). Cell proliferation is measured as the  
18 percentage of EdU positive T cells (gated as CD3<sup>+</sup> using a CD3-APC staining) using flow cytometry  
19 [21].  
20  
21  
22  
23  
24  
25  
26  
27  
28  
29  
30  
31

### 32 **Cellular Immunophenotyping**

33 Complete blood cell count report from the hematology lab will be collected on each time point, this  
34 information will be compared to our cell counts results by flow cytometry. Beside phenotypic immune  
35 cells characterization and cell counting will be completed by flow cytometry we will count the  
36 number of number of B-lymphocytes (CD45<sup>+</sup>, CD3<sup>-</sup>, CD19<sup>+</sup>), T-lymphocytes, CD4<sup>+</sup> (CD45<sup>+</sup>,  
37 CD3<sup>+</sup>, CD8<sup>-</sup>, CD4<sup>+</sup>) and CD8<sup>+</sup> (CD45<sup>+</sup>, CD3<sup>+</sup>, CD8<sup>+</sup>, CD4<sup>-</sup>), NK cells (CD45<sup>+</sup>, CD3<sup>-</sup>, CD56<sup>+</sup>),  
38 regulatory T-lymphocytes (gated on T CD4<sup>+</sup>, CD25<sup>high</sup>, CD127<sup>low</sup>), mature (CD10<sup>High</sup>,  
39 CD16<sup>High</sup>, CD14<sup>-</sup>, CRTH2<sup>-</sup>) and immature mature (CD10<sup>dim</sup>, CD16<sup>dim</sup>, CD14<sup>-</sup>, CRTH2<sup>-</sup>)  
40 polymorphonuclear cells, as previously published [24,25]. In addition, the number of HLA-DR  
41 molecules per monocyte will be determined using the BD quantibrite standardized method (HLA-  
42 DR:340827; QuantiBRITE:340495; Becton Dickenson; New Jersey, USA) [26]. It is well known that  
43 the flow cytometry is highly sensitive to variation between labs and instruments; therefore a  
44  
45  
46  
47  
48  
49  
50  
51  
52  
53  
54  
55  
56  
57  
58  
59  
60

1  
2  
3 validation with the routine hospital immunology lab was performed to guarantee that all the protocols  
4  
5 reproducible and standardized. All procedures generated results with less than 20% of variation when  
6  
7 compared to reference protocols.  
8  
9

## 10 11 **Biobanking**

12  
13 This study will provide the opportunity to establish four different types of biobanks to preserve the  
14  
15 material collected, enabling exploration of innovative biomarkers: (1) Truculture<sup>®</sup> plasma biobank  
16  
17 from whole blood stimulated with LPS, SEB (*Staphylococcus aureus* enterotoxin-B) or not  
18  
19 stimulated, to study cytokines release. (2) EDTA plasma biobank to study viral reactivation markers  
20  
21 and soluble host biomarkers. (3) Heparin plasma biobank for metabolomics/proteomics soluble host  
22  
23 biomarkers studies; (4) RNA biobank to study new transcriptomic host biomarkers (RNA will be  
24  
25 extracted from whole blood collected in PAXgene<sup>®</sup> tubes).  
26  
27  
28  
29  
30

## 31 **Innovative immune functional assays and exploration of new biomarkers**

32  
33 Regarding the immune functional tests, other stimulants (e.g. SEB) and read-outs (e.g. Interleukin 2,  
34  
35 Interferon gamma) will be tested using the TruCulture<sup>®</sup> tubes. The cytokine production levels in the  
36  
37 supernatants of the functional assays will be quantified using commercial IVD or RUO assays.  
38  
39 Finally, a metabolomics and proteomics study will be performed using frozen (heparin) plasma.  
40  
41 Biomarkers potentially associated to immune deficiency will be identified by LC-MS on high  
42  
43 resolution mass spectrometry and 1H-NMR, after polar and non-polar samples extraction.  
44  
45  
46  
47

## 48 **Sample size and data analysis plan**

### 49 *Population sizing*

50  
51 The number of healthy volunteers required to determine the reference intervals for the two immune  
52  
53 reference tests was defined according to the methodology recommended by the Clinical and  
54  
55 Laboratory Standards Institute (CLSI) C28-A3 guidelines [27]. The minimal number of subjects  
56  
57

58 15  
59  
60



recommended being 120, after exclusion of aberrant values (confidence interval of 90%), we decided to include 150 healthy volunteers to take into account exclusions related to technical reasons, aberrant values or consent withdrawal.

For this reference population, the age range of healthy volunteers group has been carefully calculated to include the expected age range and gender distribution from ICU patients in France (Table 3).

| <b>Table 3.</b> Age and gender distribution for the reference group |             |          |
|---------------------------------------------------------------------|-------------|----------|
| <b>Age range</b>                                                    | <b>Male</b> | <b>F</b> |
| [19-30[                                                             | 14          | 14       |
| [30-50[                                                             | 25          | 25       |
| [50-65[                                                             | 18          | 19       |
| [65-100[                                                            | 15          | 20       |
| Total                                                               | 72          | 78       |

The main objective being descriptive, the computation of the sample size was based on secondary objectives, especially for 1) the analysis of the occurrence of immunosuppression, its depth and impact on innate and adaptive immune responses (Cohen d is 0.55) and 2) the correlation between new

biomarkers and immune functional assays to diagnose immunosuppression ( $r > 0.4$ ). A Student t-test was used to approximate the number of patients needed and a minimum of 150 patients per group was required for a standardized Cohen's d effect = 0.55, if we get the recommended number of healthy volunteers of 120. It was therefore decided to include 160 septic shock patients, 180 severe trauma patients and 180 patients with a major surgery, to overcome secondary exclusions for technical causes or consent withdrawal. The severe burn patients group is an ancillary group that was arbitrary fixed at 30 subjects in order to collect data with the intent to inform a dedicated study on this population in the future.

#### *Statistical analysis.*

First, the percentage of patients meeting the definition of injury-induced-immunosuppression will be computed in each patients group to answer the main objective. Second, the occurrence of immunosuppression will be further described. The proportion of patients with at least one abnormal test will be computed for both immune reference tests and each patients group. The correlation between the 2 reference tests will be established from a Spearman correlation test. A mixed model

1  
2  
3 will be constructed to describe the extent of the changes in the innate and adaptive measures over  
4 time, taking groups and time points into account. Third, a comparison of each biomarker or new  
5 functional tests with the two reference tests will be performed using a Spearman correlation test. For  
6 correlated biomarkers or functional tests, the performance for prediction of secondary infection will  
7 be estimated from a ROC curve. A Fine & Gray predictive model will be constructed [28] for the  
8 biomarkers harboring the best areas under curve, taking into account the competing risk of mortality.  
9 Finally, multiple imputations will be taken into consideration in the case of a relevant amount of  
10 missing values.  
11  
12  
13  
14  
15  
16  
17  
18  
19  
20  
21  
22  
23  
24  
25  
26  
27  
28  
29  
30  
31  
32  
33  
34  
35  
36  
37  
38  
39  
40  
41  
42  
43  
44  
45  
46  
47  
48  
49  
50  
51  
52  
53  
54  
55  
56  
57  
58  
59  
60

## ETHICS AND DISSEMINATION

### Ethics approval

The protocol, information documents and consent forms received approval by the local Institutional Review Board (Comité de Protection des Personnes Sud-Est II, Bron, France) and the French National Security agency for drugs and health related products (Approval code: 69HCL15\_0379, 30<sup>th</sup> of November of 2015). An amendment has been filled to extend sampling time points over the first week and add the metabolomics and proteomics study. This amendment has been approved on the 22<sup>nd</sup> of July of 2016 (protocol version 3). This study complies with the Declaration of Helsinki, principles of Good Clinical Practice and the French personal data protection act.

### Informed consent

The free and informed consent of each patient and healthy volunteer will be obtained following a complete and faithful information, in comprehensive words, of the objectives, the proceedings and the constraints of the study, the right to refuse the enrollment or the possibility to withdraw at any time, when he/she is in capacity to understand. The patient (or next of kin) will also be informed of: (1) the existence of processing system for data concerning them; (2) Their right to access and rectify these data (accessible through the physician of their choice); (3) The possibility of the use of remaining biological material and associated data stored following the end of the study and their possible transfer to another academic or private party. This information is part of the written notice and the informed consent.

If the patient is not in capacity to understand and/or express his/her consent, the informed consent will be obtained from a next of kin. In the event that only the informed consent of a third party has been sought at the time of inclusion, the patients should be informed as soon as possible of their participation in this study and be asked to give their own consent to continue the study.

1  
2  
3 If the next of kin is not present and not available by phone, the patient may be included in emergency  
4 situation. The investigator will be required to record all steps for calling the next of kin in the medical  
5 record (Contact attempts with date, time and phone number ...) and justify patient inclusion in medical  
6 emergencies in accordance with French legislation. The written consent of the next of kin and the  
7 patient should be obtained as soon as the person is available and as soon as the patient's clinical  
8 condition allows. The consent form contains the possibility to refuse the storage of samples after the  
9 end of the study.  
10  
11  
12  
13  
14  
15  
16  
17  
18  
19

## 20 **Safety of participants**

21  
22 This study includes no serious foreseeable risk to the health of the persons involved. The only  
23 potential risk is related to blood sample collection (maximum 192 ml collected over all time points – 2  
24 months). However, this aspect of nursing is part of daily practice. Blood samples will be taken under  
25 the same conditions of safety as currently used for common diagnostic tests.  
26  
27  
28  
29  
30  
31

## 32 **Study management**

33  
34 The study is managed by BIOASTER, and a dedicated team composed from members of all the  
35 consortium partners. The promoter of the study is the Hospices Civils de Lyon. The principal  
36 investigator is Dr Thomas Rimmelé.  
37  
38  
39  
40  
41  
42  
43

## 44 **Data management**

### 45 *Clinical data*

46  
47 For each patient, an electronic case report form including socio-demographic, clinical and para-  
48 clinical information will be completed by clinical research assistants (Table 4). A description of the  
49 hospital stay, the documentation on the type of injury (surgery, burn, trauma or septic shock) and the  
50 severity as defined by the ASA classification, SOFA score [29] and SAPSII score [30]. In addition,  
51 we will collect routine lab results about the CMV, HSV1 serology and Complete Blood Count (CBC).  
52  
53  
54  
55  
56  
57  
58  
59  
60

Moreover, we will document if there is any specific treatments administered to the patient, such as antibiotics, exposure to invasive medical devices and secondary infections. All data will be transferred to a TransSMART [31] database following curation for data exploration and analysis.

**Table 4 Clinical and biological data collection planning.**

|                                                            | D0 <sup>a</sup> | D1 (2 <sup>f</sup> ) | D2 <sup>c</sup> | D3/4           | D5/7           | ICU Release | Hospital release | J14<br>D13/18  | J28<br>D26/36  | J60<br>D52/68  | D90            |
|------------------------------------------------------------|-----------------|----------------------|-----------------|----------------|----------------|-------------|------------------|----------------|----------------|----------------|----------------|
| Inclusion/exclusion criteria                               |                 | x <sup>b</sup>       |                 |                |                |             |                  |                |                |                |                |
| Consent form                                               |                 | x <sup>b</sup>       |                 |                |                |             |                  |                |                |                |                |
| Demography                                                 |                 | x <sup>b</sup>       |                 |                |                |             |                  |                |                |                |                |
| Weight                                                     |                 | x <sup>b</sup>       |                 |                |                |             |                  |                |                |                |                |
| Size                                                       |                 | x <sup>b</sup>       |                 |                |                |             |                  |                |                |                |                |
| Description of hospital stay                               |                 | x <sup>b</sup>       |                 |                |                |             |                  |                |                |                |                |
| IGS II score                                               |                 | x <sup>b</sup>       |                 |                |                |             |                  |                |                |                |                |
| McCabe score                                               |                 | x <sup>b</sup>       |                 |                |                |             |                  |                |                |                |                |
| CHARLSON score                                             |                 | x <sup>b</sup>       |                 |                |                |             |                  |                |                |                |                |
| Documentation of the septic shock, surgery, burn or trauma |                 | x <sup>b</sup>       |                 |                |                |             |                  |                |                |                |                |
| SOFA score                                                 | x               | x                    | x               | x              | X              |             |                  |                |                |                |                |
| Treatments against infections                              | Steadily        |                      |                 |                |                |             |                  | x              | x              | x              | x              |
| Therapeutic management                                     | Steadily        |                      |                 |                |                |             |                  |                |                |                |                |
| Exposition to medical devices                              | Steadily        |                      |                 |                |                |             |                  |                |                |                |                |
| Surveillance of health-care associated infections          | Steadily        |                      |                 |                |                |             |                  | x <sup>d</sup> | x <sup>d</sup> | x <sup>d</sup> | x <sup>d</sup> |
| Concomitant events                                         | Steadily        |                      |                 |                |                |             |                  | x              | x              | x              | x              |
| Vital status                                               |                 |                      |                 |                |                | X           | x                | x              | x              | x              | x              |
| Life quality (EQ5D)                                        |                 |                      |                 |                |                |             |                  |                |                |                | x              |
| <b>Biology</b>                                             |                 |                      |                 |                |                |             |                  |                |                |                |                |
| PAXgene® tube sampling                                     | x               | x                    | x               | x              | X              |             |                  | x              | x              | x              |                |
| EDTA tubes sampling                                        | x               | x                    | x               | x              | X              |             |                  | x              | x              | x              |                |
| Heparin tubes sampling                                     | x               | x                    | x               | x              | X              |             |                  | x              | x              | x              |                |
| Hematology                                                 | x               | x                    | x               | x              | X              |             |                  | x              | x              | x              |                |
| Lactate                                                    | x <sup>e</sup>  | x <sup>e</sup>       | x <sup>e</sup>  | x <sup>e</sup> | x <sup>e</sup> |             |                  |                |                |                |                |
| pH                                                         | x <sup>e</sup>  | x <sup>e</sup>       | x <sup>e</sup>  | x <sup>e</sup> | x <sup>e</sup> |             |                  |                |                |                |                |
| Liver results (ASAT, ALAT, PAL)                            | x <sup>e</sup>  | x <sup>e</sup>       | x <sup>e</sup>  | x <sup>e</sup> | x <sup>e</sup> |             |                  |                |                |                |                |

|                                                                                                                   |                |                |                |                |                |  |  |                |                |                |                |
|-------------------------------------------------------------------------------------------------------------------|----------------|----------------|----------------|----------------|----------------|--|--|----------------|----------------|----------------|----------------|
| Procalcitonin                                                                                                     | x <sup>e</sup> |  |  | x <sup>e</sup> | x <sup>e</sup> | x <sup>e</sup> | x <sup>e</sup> |
| Serology (CMV, HSV1)                                                                                              |                | X <sup>b</sup> |                |                |                |  |  |                |                |                |                |
| <sup>a</sup> Only for patients of the surgery group                                                               |                |                |                |                |                |  |  |                |                |                |                |
| <sup>b</sup> Evaluation on day 0 for patients of the surgery group (not repeated on day 1)                        |                |                |                |                |                |  |  |                |                |                |                |
| <sup>c</sup> Only for patients of the trauma group                                                                |                |                |                |                |                |  |  |                |                |                |                |
| <sup>d</sup> only if related to a new hospitalization                                                             |                |                |                |                |                |  |  |                |                |                |                |
| <sup>e</sup> if available                                                                                         |                |                |                |                |                |  |  |                |                |                |                |
| <sup>f</sup> for the septic shock and burn patients: The enrollment at D2 will be accepted if D1 is not available |                |                |                |                |                |  |  |                |                |                |                |

## Duration of the study

The study is planned to run for thirty months, starting December 2015. The expected end date for recruitment is June 2018. Some biomarkers will be quantified by batch analysis, at the end of the study. Primary data analysis is expected to be completed with subsequent dissemination of results by December 2018

## Figure Legends

**Figure 1: Schematic design of the REALISM project**, illustrating the type of patients included in the study, the various time-points, and major planned analysis.

## Acknowledgement

### *Sponsorship*

The project is funded by a consortium: bioMérieux, SANOFI, GlaxoSmithKline, Ecole Supérieure de Physique Chimie Industrielles de la ville the Paris – PSL Research University, the University Hospital Hospices Civils de Lyon and the microbiology technological institute BIOASTER. The project is financially supported in part by public funding through BIOASTER and Hospices Civils de Lyon. The project will be audited annually by the French National Research Agency (“Investissement d’Avenir” program; grant n°ANR-10-AIRT-03).

### *Consent for publication*

Not applicable

### *Competing interests*

AP, JT, VM are employees of bioMérieux, an in-vitro diagnostic company. PC, LK and DG are employees of Sanofi-Aventis R&D, Sanofi-Pasteur SA, and GlaxoSmithKline, three pharmaceutical companies.

### *Data sharing statement*

Results will be disseminated through presentations at scientific meetings and publications in peer-reviewed journals. New markers and immune functional tests will be evaluated for the diagnostic immune deficiency and may be patentable.

### **Contributorship statement:**

All authors (MLR, FV, TR, VM, PC, LQ, DG, AG, AP, JT, GM) fulfils ICMJE guidelines and (1) provided substantial contributions to conception, design and acquisition of data, (2) drafted and revised critically the manuscript and, (3) approved the final version of the manuscript.

### **Contributors**

#### **The REALISM Study Group**

22

1  
2  
3 *For University Hospital (Hospices Civils de Lyon):* Asma BEN AMOR, André BOIBIEUX, Julien  
4 DAVIDSON, Laure FAYOLLE-PIVOT, Charline GENIN, Arnaud GREGOIRE, Alain LEPAPE,  
5 Anne-Claire LUKASZEWICZ, Guillaume MARCOTTE, Delphine MAUCORT-BOULCH, Boris  
6 MEUNIER, Guillaume MONNERET, Nathalie PANEL, Thomas RIMMELE, H el ene VALLIN,  
7 Fabienne VENET

8  
9  
10  
11  
12 *For bioMerieux:* Sophie BLEIN, Karen BRENGEL-PESCE, Elisabeth CERRATO, Val erie  
13 CHEYNET, Emmanuelle GALLET-GORIUS, Audrey GUICHARD, Fran ois MALLET, Virginie  
14 MOUCADEL, Marine MOMMERT, Guy ORIOL, Alexandre PACHOT, Claire SCHREVEL, Olivier  
15 TABONE, Julien TEXTORIS, Javier YUGUEROS MARCOS.

16  
17  
18  
19  
20  
21 *For BIOASTER:* J er mie BECKER, Fr ed eric BEQUET, Yacine BOUNAB, Nathalie GARCON, Ir ene  
22 GORSE, Cyril GUYARD, Fabien LAVOCAT, Philippe LEISSNER, Karen LOUIS, Maxime  
23 MISTRETTA, Yoann MOUSCAZ, Laura NOAILLES, Magali PERRET, Fr ed eric REYNIER, Cindy  
24 RIFFAUD, Mary-Luz ROL, Nicolas SAPAY, Trang TRAN, Christophe VEDRINE.

25  
26  
27  
28  
29  
30  
31 *For Sanofi:* Nicolas BURDIN, Christophe CARRE, Pierre CORTEZ, Aymeric DE MONFORT,  
32 Karine FLORIN, Laurent FRAISSE, Isabelle FUGIER, Sandrine PAYRARD, Annick PELERAUX,  
33 Laurence QUEMENEUR

34  
35  
36 *For ESPCI Paris:* Andrew GRIFFITHS, Stephanie TOETSCH

37  
38  
39  
40 *For GSK:* Theresa ASHTON, Peter GOUGH, Scott BERGER, Lionel TAN, Iain GILLESPIE, David  
41 GARDINER

## 42 REFERENCES

- 43  
44  
45  
46 1 Jawad I, Luk si c I, Rafnsson SB. Assessing available information on the burden of sepsis: global  
47 estimates of incidence, prevalence and mortality. *J Glob Health* 2012;2:4.  
48  
49 2 Vincent J-L, Marshall JC, Namendys-Silva SA, *et al.* Assessment of the worldwide burden of  
50 critical illness: the Intensive Care Over Nations (ICON) audit. *Lancet Respir Med* 2014;2:380–6.  
51  
52 3 Walkey AJ, Lagu T, Lindenauer PK. Trends in sepsis and infection sources in the United States. A  
53 population-based study. *Ann Am Thorac Soc* 2015;12:216–20.  
54  
55 4 Seymour CW, Rea TD, Kahn JM, *et al.* Severe Sepsis in Pre-Hospital Emergency Care: Analysis  
56 of Incidence, Care, and Outcome. *Am J Respir Crit Care Med* 2012;186:1264–71.

57  
58  
59  
60 23



- 1  
2  
3 5 Singer M, Deutschman CS, Seymour CW, *et al.* The Third International Consensus Definitions for  
4 Sepsis and Septic Shock (Sepsis-3). *JAMA* 2016;315:801. doi:10.1001/jama.2016.0287  
5  
6 6 Angus DC, van der Poll T. Severe Sepsis and Septic Shock. *N Engl J Med* 2013;369:840–51.  
7  
8 7 Cohen J, Vincent J-L, Adhikari NK, *et al.* Sepsis: a roadmap for future research. *Lancet Infect Dis*  
9 2015;15:581–614.  
10  
11 8 Hotchkiss RS, Monneret G, Payen D. Sepsis-induced immunosuppression: from cellular  
12 dysfunctions to immunotherapy. *Nat Rev Immunol* 2013;13:862–74.  
13  
14 9 Hotchkiss RS, Monneret G, Payen D. Immunosuppression in sepsis: a novel understanding of the  
15 disorder and a new therapeutic approach. *Lancet Infect Dis* 2013;13:260–8.  
16  
17 10 Delsing CE, Gresnigt MS, Leentjens J, *et al.* Interferon-gamma as adjunctive immunotherapy for  
18 invasive fungal infections: a case series. *BMC Infect Dis* 2014;14:166.  
19  
20 11 Venet F, Lukaszewicz A-C, Payen D, *et al.* Monitoring the immune response in sepsis: a rational  
21 approach to administration of immunoadjuvant therapies. *Curr Opin Immunol* 2013;25:477–83.  
22  
23 12 Meisel C, Schefold JC, Pschowski R, *et al.* Granulocyte–Macrophage Colony-stimulating Factor to  
24 Reverse Sepsis-associated Immunosuppression: A Double-Blind, Randomized, Placebo-controlled  
25 Multicenter Trial. *Am J Respir Crit Care Med* 2009;180:640–8.  
26  
27 13 Gentile LF, Cuenca AG, Efron PA, *et al.* Persistent inflammation and immunosuppression: A  
28 common syndrome and new horizon for surgical intensive care. *J Trauma Acute Care Surg*  
29 2012;72:1491–501.  
30  
31 14 Angele MK, Chaudry IH. Surgical trauma and immunosuppression: pathophysiology and potential  
32 immunomodulatory approaches. *Langenbecks Arch Surg* 2005;390:333–41.  
33  
34 15 Kimura F, Shimizu H, Yoshidome H, *et al.* Immunosuppression following surgical and traumatic  
35 injury. *Surg Today* 2010;40:793–808.  
36  
37 16 Timmermans K, Kox M, Vaneker M, *et al.* Plasma levels of danger-associated molecular patterns  
38 are associated with immune suppression in trauma patients. *Intensive Care Med* 2016;42:551–61.  
39  
40 17 Gossez M, Malcus C, Demaret J, *et al.* Evaluation of a Novel Automated Volumetric Flow  
41 Cytometer for Absolute CD41 T Lymphocyte Quantitation. *Cytometry B Clin. Cytom.* 2016.  
42 10.1002/cyto.b.21360  
43  
44 18 <http://www.clinicaltrials.gov/>.  
45  
46 19 van Vught LA, Klein Klouwenberg PMC, Spitoni C, *et al.* Incidence, Risk Factors, and  
47 Attributable Mortality of Secondary Infections in the Intensive Care Unit After Admission for  
48 Sepsis. *JAMA* 2016;315:1469-79.  
49  
50 20 Duffy D, Rouilly V, Libri V, *et al.* Functional Analysis via Standardized Whole-Blood Stimulation  
51 Systems Defines the Boundaries of a Healthy Immune Response to Complex Stimuli. *Immunity*  
52 2014;40:436–50.  
53  
54 21 Poujol F, Monneret G, Friggeri A, *et al.* Flow cytometric evaluation of lymphocyte transformation  
55 test based on 5-ethynyl-2’deoxyuridine incorporation as a clinical alternative to tritiated thymidine  
56 uptake measurement. *J Immunol Methods* 2014;415:71–9.  
57  
58 24

- 1  
2  
3 22 Baker S, O'Neill B, Haddon W, *et al.* The injury severity score: a method for describing patients  
4 with multiple injuries and evaluating emergency care. *J Trauma*. 1974;14:187–96.  
5  
6 23 European Centre for Disease Prevention and Control. Point prevalence survey of  
7 healthcare-associated infections and antimicrobial use in European acute care hospitals. ECDC.  
8 2012;ISBN 978–92 – 9193–366 – 2.  
9  
10 24 Demaret J, Venet F, Friggeri A, *et al.* Marked alterations of neutrophil functions during sepsis-  
11 induced immunosuppression. *J Leukoc Biol* 2015;98:1081–90.  
12  
13 25 Venet F, Chung C-S, Kherouf H, *et al.* Increased circulating regulatory T cells  
14 (CD4+CD25+CD127–) contribute to lymphocyte anergy in septic shock patients. *Intensive Care*  
15 *Med* 2009;35:678–86.  
16  
17 26 Docke W-D. Monitoring Temporary Immunodepression by Flow Cytometric Measurement of  
18 Monocytic HLA-DR Expression: A Multicenter Standardized Study. *Clin Chem* 2005;51:2341–7.  
19  
20 27 Horowitz, Gary L, Altaie, Sousan, Boyd, James C, *et al.* CLSI C28-A3 Defining, Establishing, and  
21 Verifying Reference Intervals in the Clinical Laboratory Approved Guideline. 2008.  
22  
23 28 Fine JP, Gray RJ. A Proportional Hazards Model for the Subdistribution of a Competing Risk. *J*  
24 *Am Stat Assoc* 1999;94:496.  
25  
26 29 Vincent JL, Moreno R, Takala J, *et al.* The SOFA (Sepsis-related Organ Failure Assessment) score  
27 to describe organ dysfunction/failure. On behalf of the Working Group on Sepsis-Related  
28 Problems of the European Society of Intensive Care Medicine. *Intensive Care Med* 1996;22:707–  
29 10.  
30  
31 30 Le Gall JR, Lemeshow S, Saulnier F. A new Simplified Acute Physiology Score (SAPS II) based  
32 on a European/North American multicenter study. *JAMA J Am Med Assoc* 1993;270:2957–63.  
33  
34 31 TranSMART [<http://transmartfoundation.org/>].  
35  
36  
37  
38  
39  
40  
41  
42  
43  
44  
45  
46  
47  
48  
49  
50  
51  
52  
53  
54  
55  
56  
57  
58  
59  
60

1  
2  
3  
4  
5  
6  
7  
8  
9  
10  
11  
12  
13  
14  
15  
16  
17  
18  
19  
20  
21  
22  
23  
24  
25  
26  
27  
28  
29  
30  
31  
32  
33  
34  
35  
36  
37  
38  
39  
40  
41  
42  
43  
44  
45  
46  
47  
48  
49  
50  
51  
52  
53  
54  
55  
56  
57  
58  
59  
60

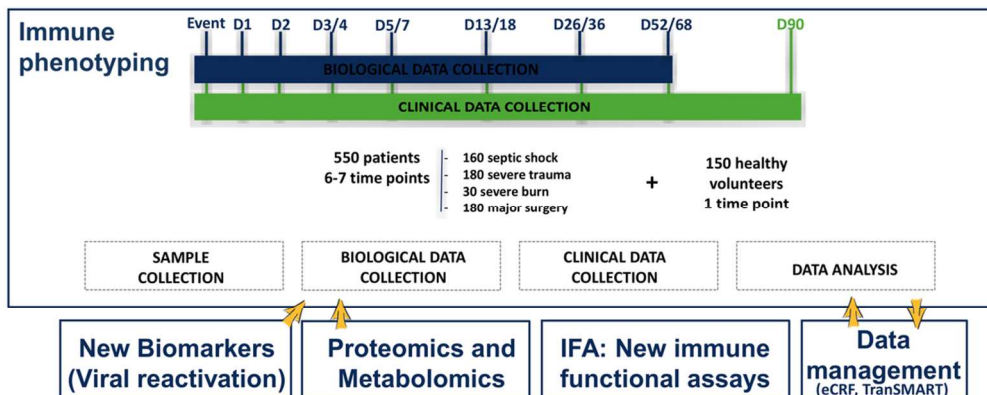

101x41mm (300 x 300 DPI)

Peer review only

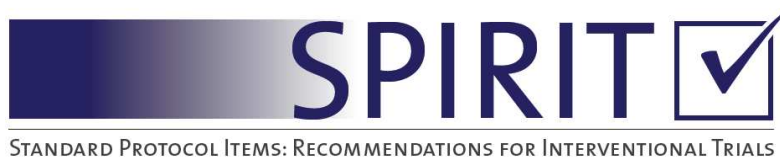

SPIRIT 2013 Checklist: Recommended items to address in a clinical trial protocol and related documents\*

| Section/item                      | Item No | Description                                                                                                                                                                                                                                                                                        |     |
|-----------------------------------|---------|----------------------------------------------------------------------------------------------------------------------------------------------------------------------------------------------------------------------------------------------------------------------------------------------------|-----|
| <b>Administrative information</b> |         |                                                                                                                                                                                                                                                                                                    |     |
| Title                             | 1       | Descriptive title identifying the study design, population, interventions, and, if applicable, trial acronym (page 1)                                                                                                                                                                              | Yes |
| Trial registration                | 2a      | Trial identifier and registry name. If not yet registered, name of intended registry (page 4)                                                                                                                                                                                                      | Yes |
|                                   | 2b      | All items from the World Health Organization Trial Registration Data Set (NA)                                                                                                                                                                                                                      |     |
| Protocol version                  | 3       | Date and version identifier (page 18)                                                                                                                                                                                                                                                              | Yes |
| Funding                           | 4       | Sources and types of financial, material, and other support (page 21)                                                                                                                                                                                                                              | Yes |
| Roles and responsibilities        | 5a      | Names, affiliations, and roles of protocol contributors (page 22-23)                                                                                                                                                                                                                               | Yes |
|                                   | 5b      | Name and contact information for the trial sponsor (page 21)                                                                                                                                                                                                                                       | Yes |
|                                   | 5c      | Role of study sponsor and funders, if any, in study design; collection, management, analysis, and interpretation of data; writing of the report; and the decision to submit the report for publication, including whether they will have ultimate authority over any of these activities (page 22) | Yes |
|                                   | 5d      | Composition, roles, and responsibilities of the coordinating centre, steering committee, endpoint adjudication committee, data management team, and other individuals or groups overseeing the trial, if applicable (see Item 21a for data monitoring committee) (page 19)                         | Yes |
| <b>Introduction</b>               |         |                                                                                                                                                                                                                                                                                                    |     |
| Background and rationale          | 6a      | Description of research question and justification for undertaking the trial, including summary of relevant studies (published and unpublished) examining benefits and harms for each intervention (page 5 and 6)                                                                                  | Yes |
|                                   | 6b      | Explanation for choice of comparators                                                                                                                                                                                                                                                              | NA  |
| Objectives                        | 7       | Specific objectives or hypotheses (page 7-8)                                                                                                                                                                                                                                                       | Yes |

|                            |              |   |                                                                                                                                                                                                                    |     |
|----------------------------|--------------|---|--------------------------------------------------------------------------------------------------------------------------------------------------------------------------------------------------------------------|-----|
| 1<br>2<br>3<br>4<br>5<br>6 | Trial design | 8 | Description of trial design including type of trial (eg, parallel group, crossover, factorial, single group), allocation ratio, and framework (eg, superiority, equivalence, noninferiority, exploratory) (page 9) | Yes |
|----------------------------|--------------|---|--------------------------------------------------------------------------------------------------------------------------------------------------------------------------------------------------------------------|-----|

### Methods: Participants, interventions, and outcomes

|                               |               |   |                                                                                                                                                                                             |     |
|-------------------------------|---------------|---|---------------------------------------------------------------------------------------------------------------------------------------------------------------------------------------------|-----|
| 7<br>8<br>9<br>10<br>11<br>12 | Study setting | 9 | Description of study settings (eg, community clinic, academic hospital) and list of countries where data will be collected. Reference to where list of study sites can be obtained (page 9) | Yes |
|-------------------------------|---------------|---|---------------------------------------------------------------------------------------------------------------------------------------------------------------------------------------------|-----|

|                                  |                      |    |                                                                                                                                                                                                         |     |
|----------------------------------|----------------------|----|---------------------------------------------------------------------------------------------------------------------------------------------------------------------------------------------------------|-----|
| 13<br>14<br>15<br>16<br>17<br>18 | Eligibility criteria | 10 | Inclusion and exclusion criteria for participants. If applicable, eligibility criteria for study centres and individuals who will perform the interventions (eg, surgeons, psychotherapists)(page 9-12) | Yes |
|----------------------------------|----------------------|----|---------------------------------------------------------------------------------------------------------------------------------------------------------------------------------------------------------|-----|

|                |               |     |                                                                                                                            |    |
|----------------|---------------|-----|----------------------------------------------------------------------------------------------------------------------------|----|
| 19<br>20<br>21 | Interventions | 11a | Interventions for each group with sufficient detail to allow replication, including how and when they will be administered | NA |
|----------------|---------------|-----|----------------------------------------------------------------------------------------------------------------------------|----|

|                            |  |     |                                                                                                                                                                                                |    |
|----------------------------|--|-----|------------------------------------------------------------------------------------------------------------------------------------------------------------------------------------------------|----|
| 22<br>23<br>24<br>25<br>26 |  | 11b | Criteria for discontinuing or modifying allocated interventions for a given trial participant (eg, drug dose change in response to harms, participant request, or improving/worsening disease) | NA |
|----------------------------|--|-----|------------------------------------------------------------------------------------------------------------------------------------------------------------------------------------------------|----|

|                      |  |     |                                                                                                                                                   |    |
|----------------------|--|-----|---------------------------------------------------------------------------------------------------------------------------------------------------|----|
| 27<br>28<br>29<br>30 |  | 11c | Strategies to improve adherence to intervention protocols, and any procedures for monitoring adherence (eg, drug tablet return, laboratory tests) | NA |
|----------------------|--|-----|---------------------------------------------------------------------------------------------------------------------------------------------------|----|

|                |  |     |                                                                                                         |     |
|----------------|--|-----|---------------------------------------------------------------------------------------------------------|-----|
| 31<br>32<br>33 |  | 11d | Relevant concomitant care and interventions that are permitted or prohibited during the trial (page 12) | Yes |
|----------------|--|-----|---------------------------------------------------------------------------------------------------------|-----|

|                                                    |          |    |                                                                                                                                                                                                                                                                                                                                                                                             |     |
|----------------------------------------------------|----------|----|---------------------------------------------------------------------------------------------------------------------------------------------------------------------------------------------------------------------------------------------------------------------------------------------------------------------------------------------------------------------------------------------|-----|
| 34<br>35<br>36<br>37<br>38<br>39<br>40<br>41<br>42 | Outcomes | 12 | Primary, secondary, and other outcomes, including the specific measurement variable (eg, systolic blood pressure), analysis metric (eg, change from baseline, final value, time to event), method of aggregation (eg, median, proportion), and time point for each outcome. Explanation of the clinical relevance of chosen efficacy and harm outcomes is strongly recommended (page 12-13) | Yes |
|----------------------------------------------------|----------|----|---------------------------------------------------------------------------------------------------------------------------------------------------------------------------------------------------------------------------------------------------------------------------------------------------------------------------------------------------------------------------------------------|-----|

|                                  |                      |    |                                                                                                                                                                                             |     |
|----------------------------------|----------------------|----|---------------------------------------------------------------------------------------------------------------------------------------------------------------------------------------------|-----|
| 43<br>44<br>45<br>46<br>47<br>48 | Participant timeline | 13 | Time schedule of enrolment, interventions (including any run-ins and washouts), assessments, and visits for participants. A schematic diagram is highly recommended (page 12)(see Figure 1) | Yes |
|----------------------------------|----------------------|----|---------------------------------------------------------------------------------------------------------------------------------------------------------------------------------------------|-----|

|                            |             |    |                                                                                                                                                                                                    |     |
|----------------------------|-------------|----|----------------------------------------------------------------------------------------------------------------------------------------------------------------------------------------------------|-----|
| 49<br>50<br>51<br>52<br>53 | Sample size | 14 | Estimated number of participants needed to achieve study objectives and how it was determined, including clinical and statistical assumptions supporting any sample size calculations (page 15-16) | Yes |
|----------------------------|-------------|----|----------------------------------------------------------------------------------------------------------------------------------------------------------------------------------------------------|-----|

|                |             |    |                                                                                     |    |
|----------------|-------------|----|-------------------------------------------------------------------------------------|----|
| 54<br>55<br>56 | Recruitment | 15 | Strategies for achieving adequate participant enrolment to reach target sample size | No |
|----------------|-------------|----|-------------------------------------------------------------------------------------|----|

### Methods: Assignment of interventions (for controlled trials)

## Allocation:

|                                  |     |                                                                                                                                                                                                                                                                                                                                                          |    |
|----------------------------------|-----|----------------------------------------------------------------------------------------------------------------------------------------------------------------------------------------------------------------------------------------------------------------------------------------------------------------------------------------------------------|----|
| Sequence generation              | 16a | Method of generating the allocation sequence (eg, computer-generated random numbers), and list of any factors for stratification. To reduce predictability of a random sequence, details of any planned restriction (eg, blocking) should be provided in a separate document that is unavailable to those who enrol participants or assign interventions | NA |
| Allocation concealment mechanism | 16b | Mechanism of implementing the allocation sequence (eg, central telephone; sequentially numbered, opaque, sealed envelopes), describing any steps to conceal the sequence until interventions are assigned                                                                                                                                                | NA |
| Implementation                   | 16c | Who will generate the allocation sequence, who will enrol participants, and who will assign participants to interventions                                                                                                                                                                                                                                | NA |
| Blinding (masking)               | 17a | Who will be blinded after assignment to interventions (eg, trial participants, care providers, outcome assessors, data analysts), and how                                                                                                                                                                                                                | NA |
|                                  | 17b | If blinded, circumstances under which unblinding is permissible, and procedure for revealing a participant's allocated intervention during the trial                                                                                                                                                                                                     | NA |

**Methods: Data collection, management, and analysis**

|                         |     |                                                                                                                                                                                                                                                                                                                                                                                                                                        |     |
|-------------------------|-----|----------------------------------------------------------------------------------------------------------------------------------------------------------------------------------------------------------------------------------------------------------------------------------------------------------------------------------------------------------------------------------------------------------------------------------------|-----|
| Data collection methods | 18a | Plans for assessment and collection of outcome, baseline, and other trial data, including any related processes to promote data quality (eg, duplicate measurements, training of assessors) and a description of study instruments (eg, questionnaires, laboratory tests) along with their reliability and validity, if known. Reference to where data collection forms can be found, if not in the protocol (pages 4,15,16,19 and 20) | Yes |
|                         | 18b | Plans to promote participant retention and complete follow-up, including list of any outcome data to be collected for participants who discontinue or deviate from intervention protocols                                                                                                                                                                                                                                              | NA  |
| Data management         | 19  | Plans for data entry, coding, security, and storage, including any related processes to promote data quality (eg, double data entry; range checks for data values). Reference to where details of data management procedures can be found, if not in the protocol (page 19)                                                                                                                                                            | Yes |
| Statistical methods     | 20a | Statistical methods for analysing primary and secondary outcomes. Reference to where other details of the statistical analysis plan can be found, if not in the protocol (page 16-17)                                                                                                                                                                                                                                                  | Yes |
|                         | 20b | Methods for any additional analyses (eg, subgroup and adjusted analyses) (page 16)                                                                                                                                                                                                                                                                                                                                                     | Yes |

|    |  |     |                                                                |     |
|----|--|-----|----------------------------------------------------------------|-----|
| 1  |  | 20c | Definition of analysis population relating to protocol non-    | Yes |
| 2  |  |     | adherence (eg, as randomised analysis), and any statistical    |     |
| 3  |  |     | methods to handle missing data (eg, multiple imputation) (page |     |
| 4  |  |     | 16)                                                            |     |
| 5  |  |     |                                                                |     |
| 6  |  |     |                                                                |     |
| 7  |  |     |                                                                |     |
| 8  |  |     |                                                                |     |
| 9  |  |     |                                                                |     |
| 10 |  |     |                                                                |     |
| 11 |  |     |                                                                |     |
| 12 |  |     |                                                                |     |
| 13 |  |     |                                                                |     |
| 14 |  |     |                                                                |     |
| 15 |  |     |                                                                |     |
| 16 |  |     |                                                                |     |
| 17 |  |     |                                                                |     |
| 18 |  |     |                                                                |     |
| 19 |  |     |                                                                |     |
| 20 |  |     |                                                                |     |
| 21 |  |     |                                                                |     |
| 22 |  |     |                                                                |     |
| 23 |  |     |                                                                |     |
| 24 |  |     |                                                                |     |
| 25 |  |     |                                                                |     |
| 26 |  |     |                                                                |     |
| 27 |  |     |                                                                |     |
| 28 |  |     |                                                                |     |
| 29 |  |     |                                                                |     |
| 30 |  |     |                                                                |     |
| 31 |  |     |                                                                |     |
| 32 |  |     |                                                                |     |
| 33 |  |     |                                                                |     |
| 34 |  |     |                                                                |     |
| 35 |  |     |                                                                |     |
| 36 |  |     |                                                                |     |
| 37 |  |     |                                                                |     |
| 38 |  |     |                                                                |     |
| 39 |  |     |                                                                |     |
| 40 |  |     |                                                                |     |
| 41 |  |     |                                                                |     |
| 42 |  |     |                                                                |     |
| 43 |  |     |                                                                |     |
| 44 |  |     |                                                                |     |
| 45 |  |     |                                                                |     |
| 46 |  |     |                                                                |     |
| 47 |  |     |                                                                |     |
| 48 |  |     |                                                                |     |
| 49 |  |     |                                                                |     |
| 50 |  |     |                                                                |     |
| 51 |  |     |                                                                |     |
| 52 |  |     |                                                                |     |
| 53 |  |     |                                                                |     |
| 54 |  |     |                                                                |     |
| 55 |  |     |                                                                |     |
| 56 |  |     |                                                                |     |
| 57 |  |     |                                                                |     |
| 58 |  |     |                                                                |     |
| 59 |  |     |                                                                |     |
| 60 |  |     |                                                                |     |

**Methods: Monitoring**

|                 |     |                                                                                                                                                                                                                                                                                                                                       |     |
|-----------------|-----|---------------------------------------------------------------------------------------------------------------------------------------------------------------------------------------------------------------------------------------------------------------------------------------------------------------------------------------|-----|
| Data monitoring | 21a | Composition of data monitoring committee (DMC); summary of its role and reporting structure; statement of whether it is independent from the sponsor and competing interests; and reference to where further details about its charter can be found, if not in the protocol. Alternatively, an explanation of why a DMC is not needed | NA  |
|                 | 21b | Description of any interim analyses and stopping guidelines, including who will have access to these interim results and make the final decision to terminate the trial                                                                                                                                                               | NA  |
| Harms           | 22  | Plans for collecting, assessing, reporting, and managing solicited and spontaneously reported adverse events and other unintended effects of trial interventions or trial conduct (page 19)                                                                                                                                           | Yes |
| Auditing        | 23  | Frequency and procedures for auditing trial conduct, if any, and whether the process will be independent from investigators and the sponsor (page 13)                                                                                                                                                                                 | Yes |

**Ethics and dissemination**

|                          |     |                                                                                                                                                                                                                                            |     |
|--------------------------|-----|--------------------------------------------------------------------------------------------------------------------------------------------------------------------------------------------------------------------------------------------|-----|
| Research ethics approval | 24  | Plans for seeking research ethics committee/institutional review board (REC/IRB) approval (page 18)                                                                                                                                        | Yes |
| Protocol amendments      | 25  | Plans for communicating important protocol modifications (eg, changes to eligibility criteria, outcomes, analyses) to relevant parties (eg, investigators, REC/IRBs, trial participants, trial registries, journals, regulators) (page 18) | Yes |
| Consent or assent        | 26a | Who will obtain informed consent or assent from potential trial participants or authorised surrogates, and how (see Item 32) (page 18)                                                                                                     | Yes |
|                          | 26b | Additional consent provisions for collection and use of participant data and biological specimens in ancillary studies, if applicable (page 18)                                                                                            | Yes |
| Confidentiality          | 27  | How personal information about potential and enrolled participants will be collected, shared, and maintained in order to protect confidentiality before, during, and after the trial (page 19)                                             | Yes |
| Declaration of interests | 28  | Financial and other competing interests for principal investigators for the overall trial and each study site (page 21)                                                                                                                    | Yes |

|    |                               |     |                                                                                                                                                                                                                                                                                              |     |
|----|-------------------------------|-----|----------------------------------------------------------------------------------------------------------------------------------------------------------------------------------------------------------------------------------------------------------------------------------------------|-----|
| 1  | Access to data                | 29  | Statement of who will have access to the final trial dataset, and disclosure of contractual agreements that limit such access for investigators(page 4)                                                                                                                                      | Yes |
| 2  |                               |     |                                                                                                                                                                                                                                                                                              |     |
| 3  |                               |     |                                                                                                                                                                                                                                                                                              |     |
| 4  |                               |     |                                                                                                                                                                                                                                                                                              |     |
| 5  |                               |     |                                                                                                                                                                                                                                                                                              |     |
| 6  | Ancillary and post-trial care | 30  | Provisions, if any, for ancillary and post-trial care, and for compensation to those who suffer harm from trial participation                                                                                                                                                                | NA  |
| 7  |                               |     |                                                                                                                                                                                                                                                                                              |     |
| 8  |                               |     |                                                                                                                                                                                                                                                                                              |     |
| 9  | Dissemination policy          | 31a | Plans for investigators and sponsor to communicate trial results to participants, healthcare professionals, the public, and other relevant groups (eg, via publication, reporting in results databases, or other data sharing arrangements), including any publication restrictions(page 22) | Yes |
| 10 |                               |     |                                                                                                                                                                                                                                                                                              |     |
| 11 |                               |     |                                                                                                                                                                                                                                                                                              |     |
| 12 |                               |     |                                                                                                                                                                                                                                                                                              |     |
| 13 |                               |     |                                                                                                                                                                                                                                                                                              |     |
| 14 |                               |     |                                                                                                                                                                                                                                                                                              |     |
| 15 |                               |     |                                                                                                                                                                                                                                                                                              |     |
| 16 |                               | 31b | Authorship eligibility guidelines and any intended use of professional writers(page 22)                                                                                                                                                                                                      | Yes |
| 17 |                               |     |                                                                                                                                                                                                                                                                                              |     |
| 18 |                               |     |                                                                                                                                                                                                                                                                                              |     |
| 19 |                               | 31c | Plans, if any, for granting public access to the full protocol, participant-level dataset, and statistical code                                                                                                                                                                              | No  |
| 20 |                               |     |                                                                                                                                                                                                                                                                                              |     |
| 21 |                               |     |                                                                                                                                                                                                                                                                                              |     |
| 22 | <b>Appendices</b>             |     |                                                                                                                                                                                                                                                                                              |     |
| 23 |                               |     |                                                                                                                                                                                                                                                                                              |     |
| 24 | Informed consent materials    | 32  | Model consent form and other related documentation given to participants and authorised surrogates(page 18)                                                                                                                                                                                  | Yes |
| 25 |                               |     |                                                                                                                                                                                                                                                                                              |     |
| 26 |                               |     |                                                                                                                                                                                                                                                                                              |     |
| 27 |                               |     |                                                                                                                                                                                                                                                                                              |     |
| 28 | Biological specimens          | 33  | Plans for collection, laboratory evaluation, and storage of biological specimens for genetic or molecular analysis in the current trial and for future use in ancillary studies, if applicable (page 14)                                                                                     | Yes |
| 29 |                               |     |                                                                                                                                                                                                                                                                                              |     |
| 30 |                               |     |                                                                                                                                                                                                                                                                                              |     |
| 31 |                               |     |                                                                                                                                                                                                                                                                                              |     |
| 32 |                               |     |                                                                                                                                                                                                                                                                                              |     |
| 33 |                               |     |                                                                                                                                                                                                                                                                                              |     |

\*It is strongly recommended that this checklist be read in conjunction with the SPIRIT 2013 Explanation & Elaboration for important clarification on the items. Amendments to the protocol should be tracked and dated. The SPIRIT checklist is copyrighted by the SPIRIT Group under the Creative Commons "[Attribution-NonCommercial-NoDerivs 3.0 Unported](https://creativecommons.org/licenses/by-nc-nd/3.0/)" license.
